## **PI3K $\delta$ hyper-activation promotes the development of B cells that exacerbate *Streptococcus pneumoniae* infection in an antibody-independent manner**

Anne-Katrien Stark<sup>1,2\*</sup>, Anita Chandra<sup>1,2,3,4\*</sup>, Krishnendu Chakraborty<sup>1,3</sup>, Rafeah Alam<sup>1</sup>, Valentina Carbonaro<sup>1</sup>, Jonathan Clark<sup>5</sup>, Srividya Srisantharajah<sup>6</sup>, Glyn Bradley<sup>7</sup>, Alex G. Richter<sup>8,9</sup>, Edward Banham-Hall<sup>1,3,4</sup>, Menna R. Clatworthy<sup>10</sup>, Sergey Nejentsev<sup>3</sup>, J. Nicole Hamblin<sup>6</sup>, Edith M. Hessel<sup>6</sup>, Alison M. Condliffe<sup>11</sup>, Klaus Okkenhaug<sup>1,2,#</sup>

1. Laboratory of Lymphocyte Signalling and Development, Babraham Institute, Cambridge CB21 3AT, UK.
2. Division of Immunology, Department of Pathology, University of Cambridge, Cambridge CB2 1QP, UK.
3. Department of Medicine, University of Cambridge, CB2 0QQ, UK.
4. Cambridge University Hospitals NHS Trust, Hills Road, Cambridge, CB2 0QQ
5. Biological Chemistry Laboratory, Babraham Institute, Cambridge CB21 3AT, UK.
6. Refractory Respiratory Inflammation Discovery Performance Unit, Respiratory Therapy Area, GlaxoSmithKline, Stevenage, SG1 2NY, UK.
7. Computational Biology and Statistics, Target Sciences, GlaxoSmithKline, Stevenage, SG1 2NY, UK.
8. Department of Immunology, Queen Elizabeth Hospital, Birmingham, UK.
9. Institute of Immunology and Immunotherapy, University of Birmingham, UK.
10. Molecular Immunity Unit, University of Cambridge Department of Medicine, MRC Laboratory of Molecular Biology, CB2 0QQ, UK.
11. Department of Department of Infection, Immunity and Cardiovascular Diseases, University of Sheffield, Sheffield S10 2RX, UK.

\* Joint first authors.

# Correspondence: [ko256@cam.ac.uk](mailto:ko256@cam.ac.uk)

## Abstract

1 ***Streptococcus pneumoniae* is a major cause of pneumonia and a leading cause of death**  
2 **world-wide. Antibody-mediated immune responses can offer protection against repeated**  
3 **exposure to *S. pneumoniae*, yet vaccines only offer partial protection. Patients with**  
4 **Activated PI3K $\delta$  Syndrome (APDS) are highly susceptible to *S. pneumoniae*. We generated**  
5 **a conditional knockin mouse model of this disease and identified a CD19<sup>+</sup>B220<sup>-</sup> B cell**  
6 **subset that is induced by PI3K $\delta$  signaling, is resident in the lungs, and which promotes**  
7 **increased susceptibility to *S. pneumoniae* during the early phase of infection via an**  
8 **antibody-independent mechanism. We show that an inhaled PI3K $\delta$  inhibitor improves**  
9 **survival rates following *S. pneumoniae* infection in wild-type mice and in mice with**  
10 **activated PI3K $\delta$ . These results suggest that a subset of B cells in the lung can promote the**  
11 **severity of *S. pneumoniae* infection, representing a novel therapeutic target.**

## 12 Introduction

13 *Streptococcus pneumoniae* is an invasive extracellular bacterial pathogen and is a leading  
14 cause of morbidity and mortality. Although *S. pneumoniae* can cause disease in  
15 immunocompetent adults, it commonly colonizes the upper airways without causing  
16 disease. The World Health Organization has estimated that there are 14.5 million episodes  
17 of severe pneumococcal disease and that 1.6 million people die of pneumococcal disease  
18 every year<sup>1</sup>. Despite the implementation of global vaccination programs, *S. pneumoniae*  
19 infection remains a major disease burden<sup>2-4</sup>.

20  
21 Invasive *S. pneumoniae* infection is a major cause of lower airway infections (pneumonia),  
22 sepsis and meningitis. Healthy people at the extremes of age are more susceptible to  
23 pneumococcal disease, as are people with chronic obstructive pulmonary disease (COPD),  
24 however those at greatest risk are patients with splenic dysfunction or immune deficiency.  
25 This increased susceptibility results at least in part from the lack of protective antibodies  
26 against conserved protein antigens or against polysaccharides that form part of the  
27 pneumococcal capsule<sup>5</sup>. Indeed, the protective role of antibodies in pneumococcal disease  
28 is most obvious in individuals with congenital (primary) immunodeficiencies (PIDs). This was  
29 first recognized in a patient with X-linked agammaglobulinemia (XLA), a syndrome  
30 subsequently shown to be caused by a block in B cell development due to loss-of-function  
31 mutations in *BTK*<sup>6-8</sup>. These patients remain highly susceptible to *S. pneumoniae* into  
32 adulthood, but can be effectively treated by the administration of immunoglobulins from  
33 healthy donors.

34  
35 We and others have recently described cohorts of immune deficient patients with activating  
36 mutations in *PIK3CD*, the gene encoding the p110 $\delta$  catalytic subunit of phosphoinositide 3-  
37 kinase  $\delta$  (PI3K $\delta$ )<sup>9-11</sup>. PI3K $\delta$  is a lipid kinase that catalyzes the phosphorylation of the  
38 phosphatidylinositol-(4,5)-bisphosphate lipid to produce phosphatidylinositol-(3,4,5)-  
39 trisphosphate (PIP<sub>3</sub>). PI3K $\delta$  is expressed in cells of the immune system and regulates many  
40 aspects of immune cell signaling, particularly in lymphocytes<sup>12, 13</sup>. Activated  
41 phosphoinositide 3-kinase  $\delta$  syndrome (APDS) is a combined immunodeficiency affecting T  
42 and B cells. APDS patients suffer from recurrent sinopulmonary infections, with *S.*  
43 *pneumoniae* being the most commonly isolated pathogen<sup>14</sup>. 85% of APDS patients have  
44 been diagnosed with pneumonia<sup>15</sup>. APDS patients are also more likely to develop structural  
45 lung damage (bronchiectasis) than patients with other PIDs<sup>14</sup>. The mechanism underpinning

46 the increased susceptibility to pneumococcal infection in APDS is unclear<sup>12</sup>. Although APDS  
47 patients often lack IgG2, the protection afforded by immunoglobulin replacement therapy is  
48 not as robust as that observed in patients with pure antibody deficiencies, suggesting that  
49 antibody-independent PI3K $\delta$ -driven mechanisms may be involved<sup>14</sup>. The monogenic nature  
50 of APDS allows us to dissect mechanisms of susceptibility to *S. pneumoniae* infection on  
51 cellular and molecular levels, and to determine whether PI3K $\delta$  inhibitors may help reduce  
52 the susceptibility to *S. pneumoniae*. If so, PI3K $\delta$  inhibitors, that are in development for the  
53 treatment of inflammatory and autoimmune diseases, might also have wider applications to  
54 reduce the pathological consequences of *S. pneumoniae* infection<sup>16</sup>. In this study, we have  
55 explored mechanisms by which PI3K $\delta$  hyperactivation drives susceptibility to *S. pneumoniae*  
56 infection. We found that the administration of the PI3K $\delta$ -selective inhibitor nemiralisib  
57 (GSK-22696557)<sup>17, 18</sup> reduced the severity of pneumococcal disease in wild-type mice. To  
58 investigate this further, we generated a p110 $\delta^{\text{E1020K}}$  mouse model that accurately  
59 recapitulates the genetics and immunological phenotype of APDS, and displays increased  
60 susceptibility to *S. pneumoniae* infection. We show that this susceptibility segregates with  
61 enhanced PI3K $\delta$  signaling in B cells, which exacerbate *S. pneumoniae* infection at early time  
62 points before the adaptive immune response comes into play. Of note, we have identified a  
63 previously unappreciated population of CD19<sup>+</sup>B220<sup>-</sup> IL-10-secreting cells that was present in  
64 wild-type mice but expanded 10-20 fold in p110 $\delta^{\text{E1020K}}$  mice. We demonstrate that  
65 nemiralisib reduces the frequency of IL-10-producing B cells in the lung and improves  
66 survival of p110 $\delta^{\text{E1020K}}$  mice. Similarly, a higher proportion of transitional B cells from APDS  
67 patients produced IL-10 and this was reduced by nemiralisib. This study provides new  
68 insights into the pathogenesis of the early stages of invasive *S. pneumoniae* disease and  
69 offers the potential of future therapeutic strategy to alleviate the severity of this disease in  
70 susceptible patients.

## 71 Results

### 72 Inhaled nemiralisib alleviates the severity of *S. pneumoniae* infection in mice

73 Given that APDS patients are more susceptible to *S. pneumoniae*, we sought to determine  
74 whether nemiralisib, an inhaled PI3K $\delta$  inhibitor which is in development for the treatment  
75 and prevention of COPD exacerbations<sup>17, 18</sup>, would alter susceptibility to airway infections.  
76 We treated mice with nemiralisib and then infected them intranasally with *S. pneumoniae*.  
77 Nemiralisib-treated mice showed prolonged survival compared to mice given vehicle control  
78 (Fig 1). This protection was only effective if the drug was administered before and during  
79 infection (Fig 1). By contrast, nemiralisib administration 8h or 24h post infection had no  
80 impact on survival of the mice. These data suggest that PI3K $\delta$  modulates the immune  
81 response during early *S. pneumoniae* infection, either by inhibiting protective immunity, or  
82 by promoting an adverse response.

83

### 84 Mouse model of APDS: hyperactive PI3K $\delta$ signaling and altered B and T cell 85 development in p110 $\delta$ <sup>E1020K</sup> mice

86 We generated a conditional knock-in mouse harboring mutation E1020K in the *Pik3cd* gene  
87 that is equivalent to the most common APDS-causing mutation E1021K in humans  
88 (Supplementary Fig 1). These mice were subsequently crossed with different Cre-expressing  
89 lines to either generate germline mice where p110 $\delta$ <sup>E1020K</sup> is expressed in all cells  
90 (p110 $\delta$ <sup>E1020K-GL</sup>) or selectively in B cells using *Mb1*<sup>Cre</sup> (p110 $\delta$ <sup>E1020K-B</sup>), in T cells using *Cd4*<sup>Cre</sup>  
91 (p110 $\delta$ <sup>E1020K-T</sup>) or myeloid cells using *Lyz2*<sup>Cre</sup> (p110 $\delta$ <sup>E1020K-M</sup>). We studied p110 $\delta$ <sup>E1020K</sup> mice in  
92 comparison with wild-type and p110 $\delta$ <sup>D910A</sup> mice that have catalytically inactive p110 $\delta$ <sup>19</sup>.

93

94 Initially, we tested if p110 $\delta$ <sup>E1020K</sup> mice have increased PI3K $\delta$  activity and display the  
95 characteristic immunological phenotype of APDS. Biochemical analyses of B cells and T cells  
96 from p110 $\delta$ <sup>E1020K-GL</sup> mice confirmed that the kinase is hyperactive (Fig 2). Measurements of  
97 PIP<sub>3</sub> in T cells showed that p110 $\delta$ <sup>E1020K</sup> is about 6 times as active as the wild-type kinase  
98 following stimulation with anti-CD3 and anti-CD28, but with no evidence for increased basal  
99 activity (Fig 2A). In B cells, p110 $\delta$ <sup>E1020K</sup> led to increased basal PIP<sub>3</sub> levels, but it was further  
100 increased only about 2-fold compared to wild-type mice after stimulation with anti-IgM (Fig  
101 2B). This pattern resembles results found in patients with APDS<sup>10</sup>. In wild-type and  
102 p110 $\delta$ <sup>E1020K-GL</sup> cells, the PI3K $\delta$ -selective inhibitor nemiralisib reduced PIP<sub>3</sub> to the background  
103 level observed in p110 $\delta$ <sup>D910A</sup> cells, which, as expected, were insensitive to nemiralisib (Fig  
104 2A, B).

105

106 PIP<sub>3</sub> binds to the protein kinase AKT, supporting its phosphorylation on Thr308 and  
107 subsequent activation. Western blotting of purified p110 $\delta$ <sup>E1020K-GL</sup> T cells showed increased  
108 AKT phosphorylation following stimulation with anti-CD3 and anti-CD28 antibodies  
109 compared to wild-type cells, whereas AKT phosphorylation in p110 $\delta$ <sup>D910A</sup> T cells was below  
110 the limit of detection (Fig 2C). In B cells, both basal and anti-IgM-induced phosphorylation of  
111 AKT were elevated in p110 $\delta$ <sup>E1020K-GL</sup> cells, while strongly diminished in p110 $\delta$ <sup>D910A</sup> B cells (Fig  
112 2D). The phosphorylation of ERK and the AKT effector proteins, FOXO and S6, were similarly  
113 affected. All phosphorylation events in wild-type and p110 $\delta$ <sup>E1020K-GL</sup> cells were reduced to  
114 the levels observed in p110 $\delta$ <sup>D910A</sup> cells by inhibition with nemiralisib. As expected, p110 $\delta$   
115 protein expression was not affected by the E1020K or D910A mutations (Figs 2C, D).

116

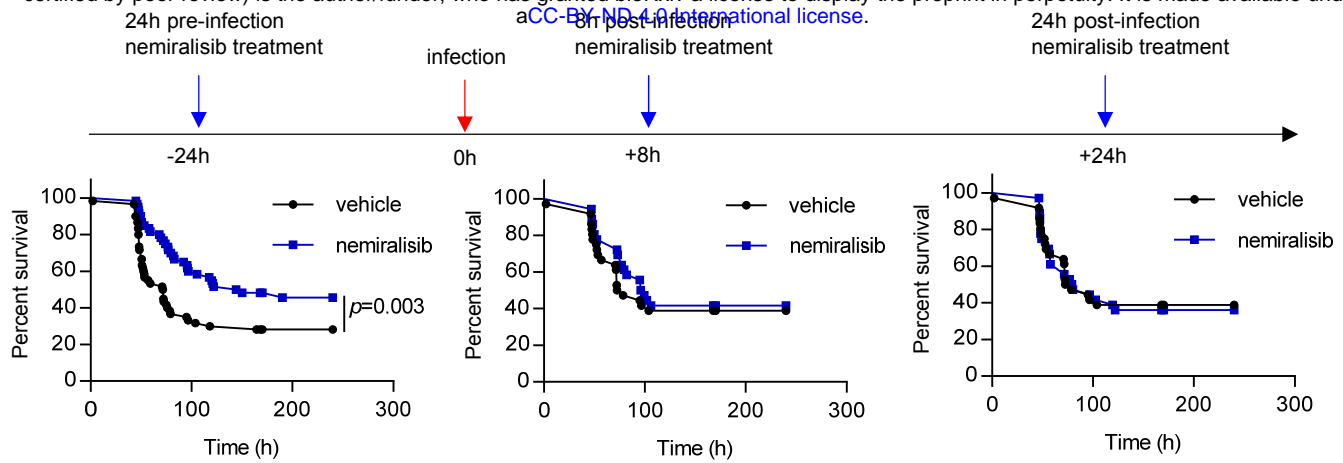

**Figure 1: Prophylactic, but not therapeutic treatment with the inhaled PI3K $\delta$  inhibitor nemiralisib mitigates disease severity following *S. pneumoniae* infection in wild-type mice.**

Wild-type mice were treated twice daily with the inhaled PI3K $\delta$  inhibitor nemiralisib for the duration of the study: when treatment was started 24h prior to infection with *S. pneumoniae*, survival rates were improved. When started 8h or 24h post-infection, the treatment had no effect on survival outcome. (-24h: data from 5 independent experiments combined n=60; +8h/+24h: data from 3 independent experiments combined n=36).

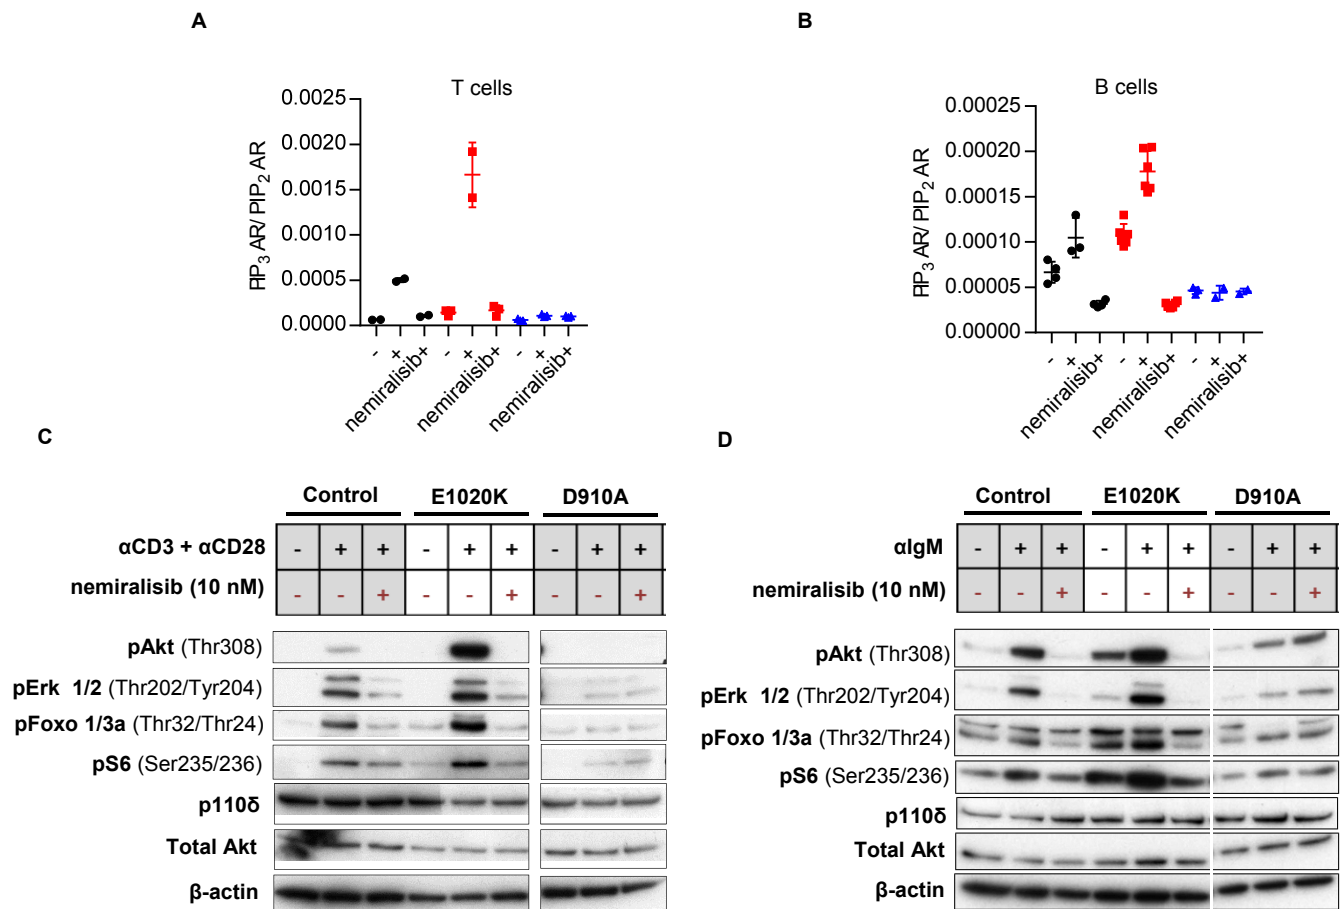

**Figure 2: PI3K $\delta$  hyper-activation leads to increased PIP $_3$  and pAKT levels that can be reduced using a selective PI3K $\delta$  inhibitor**

**A:** PIP $_3$  levels in purified T cells from wild-type, p110 $\delta^{E1020K}$  and p110 $\delta^{D910A}$  mice, unstimulated or stimulated with anti-CD3 and anti-CD28 in the presence or absence of the selective PI3K $\delta$  inhibitor, nemiralisib (n=2-3). **B:** PIP $_3$  levels in purified B cells from wild-type, p110 $\delta^{E1020K}$  and p110 $\delta^{D910A}$  mice unstimulated, or stimulated with anti-IgM in the presence or absence of nemiralisib (n=2-6). **C:** Western blots of purified T cells from wild-type, p110 $\delta^{E1020K}$  and p110 $\delta^{D910A}$  mice, unstimulated or stimulated with anti-CD3 and anti-CD28 in the presence or absence of nemiralisib. **D:** Western blots of purified B cells from wild-type, p110 $\delta^{E1020K}$  and p110 $\delta^{D910A}$  mice, unstimulated or stimulated with anti-IgM in the presence or absence of nemiralisib. (Representative of 2 independent experiments).

117 Germline p110 $\delta^{E1020K-GL}$  mice had near normal numbers of myeloid cells in the bone marrow  
118 and spleen. In the bone marrow we observed a significant B cell lymphopenia that was  
119 associated with a block in B cell development between Pro-B and Pre-B cells and did not  
120 extend to the spleen. Although these mice had normal numbers of splenic B cells, there was  
121 an increased proportion of marginal zone B and B1 cells with an altered distribution of  
122 transitional B cells (Supplementary Fig. 2). The thymus of p110 $\delta^{E1020K-GL}$  mice was normal  
123 except for a mild reduction in single positive CD8<sup>+</sup> T cells. In the spleens and lymph nodes  
124 there were increased proportions of activated/memory T cells identified by high CD44  
125 expression and low CD62L expression, and increased numbers of Foxp3<sup>+</sup> T regulatory cells  
126 (Supplementary Fig 3). These T cell and B cell phenotypes were recapitulated in p110 $\delta^{E1020K-T}$   
127 and p110 $\delta^{E1020K-B}$  mice, respectively (Supplementary Figs 4 and 5.). The reciprocal effects of  
128 the inhibitory D910A and activating E1020K mutations on specific cell subsets demonstrate  
129 the pivotal role of PIP<sub>3</sub> during lymphocyte development and highlight the importance of a  
130 tight control of PI3K $\delta$  activity.

131

132 Analysis of serum immunoglobulins showed that p110 $\delta^{E1020K-GL}$  mice had elevated levels of  
133 IgG1 and IgG2b and a trend towards increased levels of IgG2c, IgA, and IgE isotypes  
134 compared to wild-type mice. There was also a trend to hyper IgM in p110 $\delta^{E1020K-GL}$  mice as  
135 is frequently observed in APDS patients<sup>10, 11, 14</sup>, whereas p110 $\delta^{D910A}$  mice were antibody  
136 deficient (Supplementary Fig 6). The level of serum IgG3, which has been shown to be  
137 protective against *S. pneumoniae*<sup>19</sup>, was comparable in p110 $\delta^{E1020K-GL}$  and wild-type mice  
138 (Supplementary Fig 6).

139

#### 140 Susceptibility to *S. pneumoniae* is caused by PI3K $\delta$ hyper-activation in B cells

141 Given that the immunological phenotype of p110 $\delta^{E1020K-GL}$  mice strongly resembled that of  
142 APDS, we sought to determine whether these mice recapitulate the increased susceptibility  
143 to *S. pneumoniae* observed in APDS patients. We infected p110 $\delta^{E1020K-GL}$ , p110 $\delta^{D910A}$ , and  
144 p110 $\delta^{WT}$  mice with *S. pneumoniae* (TIGR4 serotype 4) and followed their survival for 10 days  
145 (Fig 3A). Interestingly, despite being antibody-deficient, p110 $\delta^{D910A}$  mice did not show  
146 increased susceptibility to *S. pneumoniae*. By contrast, p110 $\delta^{E1020K-GL}$  mice showed  
147 accelerated disease onset and increased mortality (Fig 3A).

148

149 In order to determine the cell type responsible for increased susceptibility to *S.*  
150 *pneumoniae*, we next infected the lineage-restricted p110 $\delta^{E1020K-B}$ , p110 $\delta^{E1020K-T}$  and  
151 p110 $\delta^{E1020K-M}$  mice. Myeloid expression of p110 $\delta^{E1020K}$  had no effect on the course of *S.*  
152 *pneumoniae* infection (Fig 3B), whereas expression of p110 $\delta^{E1020K}$  in T cells was protective  
153 (Fig 3C). Only the p110 $\delta^{E1020K-B}$  mice replicated the increased susceptibility of the  
154 p110 $\delta^{E1020K-GL}$  mice to *S. pneumoniae* (Fig 3D). Furthermore, transfer of p110 $\delta^{E1020K-B}$  bone  
155 marrow into irradiated RAG2<sup>-/-</sup> recipients also conferred increased susceptibility to  
156 infection, which was only partially rescued by co-transferring wild-type and p110 $\delta^{E1020K-B}$   
157 bone marrow at a 1:1 ratio (Fig 3E). These results indicate that B cells drive the increased  
158 susceptibility to *S. pneumoniae* infection in p110 $\delta^{E1020K-GL}$  mice in an immune-dominant  
159 manner.

160

161 Natural antibodies against phosphorylcholine (PC) can offer protection against infection  
162 with encapsulated bacteria, including *S. pneumoniae*<sup>20, 21</sup>. We found that p110 $\delta^{D910A}$  mice  
163 lacked anti-PC antibodies, presumably because of the absence of B1 and MZ B cells which

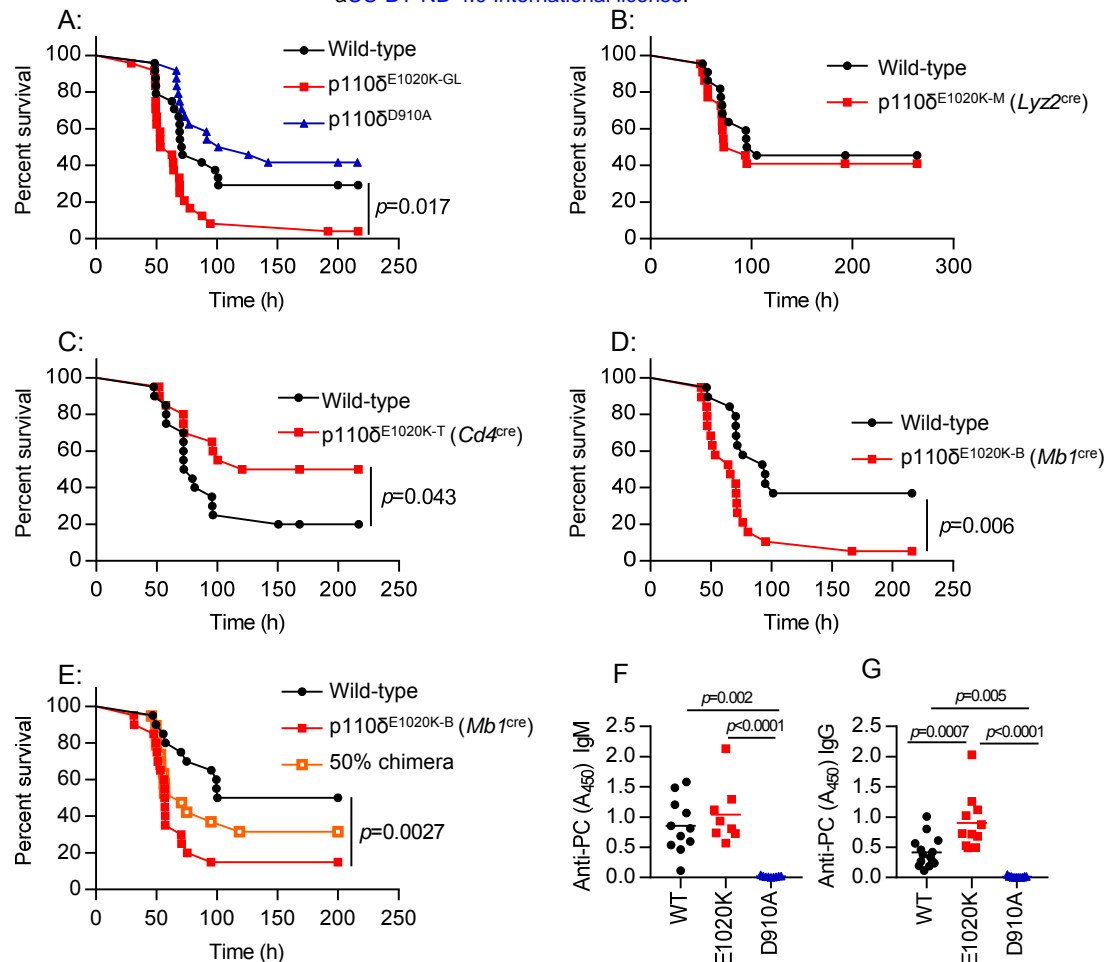

### Figure 3: PI3Kδ hyper-activation leads to increased susceptibility to *S. pneumoniae* infection

**A:** Germline p110δ<sup>E1020K-GL</sup> mice show accelerated disease development and significantly increased mortality compared to control mice in response *S. pneumoniae* infection, while kinase dead p110δ<sup>D910A</sup> mice do not respond differently to wild-type mice. **B-D:** The p110δ<sup>E1020K</sup> mutation was introduced conditionally into myeloid cells, T cells and B cells by crossing onto *Lyz2<sup>cre</sup>*, *Cd4<sup>cre</sup>* and *Mb1<sup>cre</sup>* lines respectively. The myeloid conditional mutation did not affect survival following *S. pneumoniae* infection in p110δ<sup>E1020K-M</sup> mice (B), while T cell conditional p110δ hyper-activation lead to improved survival in p110δ<sup>E1020K-T</sup> mice (C). However, introducing the p110δ<sup>E1020K</sup> mutation specifically in B cells (p110δ<sup>E1020K-B</sup> mice) replicated the increased susceptibility to *S. pneumoniae* seen in p110δ<sup>E1020K-GL</sup> mice (D). **E:** Transfer of p110δ<sup>E1020K-B</sup> bone marrow into irradiated RAG2<sup>-/-</sup> recipients also conferred increased susceptibility to *S. pneumoniae* infection compared to recipients receiving wild-type bone marrow, and this phenotype was not fully rescued in a 50% BM chimera. **F-G:** Naïve PI3Kδ<sup>E1020K</sup> mice produce normal levels of anti-phosphorylcholine IgM and significantly higher levels of anti-PC IgG, while PI3Kδ<sup>D910A</sup> mice produce no natural antibody. (Data from 2 independent experiments combined. A: n=24; B: n=22; C: n=20; D: n=20; E: n=20; F-G: WT n=11; E1020K n=8 D910A n=9).

164 are the major source of natural antibodies<sup>19, 22-24</sup>. By contrast, anti-PC antibodies in the  
165 serum from p110δ<sup>E1020K</sup> mice were similar (IgM) or elevated (IgG)(Fig 3 F , G) compared to  
166 wild-type mice. Therefore, susceptibility to *S. pneumoniae* in p110δ<sup>E1020K</sup> mice cannot be  
167 explained by a failure to produce natural antibodies against conserved bacterial epitopes.

168

169 B cells drive early pathology during *S. pneumoniae* infection in an antibody-  
170 independent manner but are required to prevent chronic infection

171 In order to further investigate antibody-mediated protection in the context of PI3Kδ hyper-  
172 activation, we immunized mice with Pneumovax, a 23-valent polysaccharide vaccine<sup>25</sup>.  
173 Following infection with *S. pneumoniae*, wild-type mice were completely protected by this  
174 vaccination protocol, while p110δ<sup>E1020K-GL</sup> mice were only partially protected, to a level  
175 similar to that in non-immunized wild-type mice. By contrast, p110δ<sup>D910A</sup> mice did not  
176 benefit from vaccination (Fig 4A, B). Interestingly, p110δ<sup>E1020K-GL</sup> mice and wild-type mice  
177 produced a similar antibody response, in contrast to p110δ<sup>D910A</sup> mice that showed no  
178 response (Fig 4C). These data indicate that Pneumovax vaccination clearly protects against  
179 *S. pneumoniae*, as shown in immunized wild-type mice. Despite this protection p110δ<sup>E1020K</sup>  
180 mice remained significantly more susceptible to *S. pneumoniae* infection. Together, these  
181 data suggest that B cells can affect susceptibility to *S. pneumoniae* by a mechanism that is at  
182 least in part antibody-independent.

183

184 To determine more definitively whether B cells can be pathogenic in the context of *S.*  
185 *pneumoniae* infection, we infected wild-type and *Ighm*<sup>tm1</sup> (μMT) mice which lack mature B  
186 cells<sup>26</sup>. Strikingly, *Ighm*<sup>tm1</sup> mice showed reduced susceptibility to *S. pneumoniae* infection,  
187 delaying disease onset from ~2 days in wild-type mice to ~5 days in *Ighm*<sup>tm1</sup> mice (Fig 5).  
188 Although survival in *Ighm*<sup>tm1</sup> mice was increased up to 30 days post infection compared to  
189 wild-type mice, CFU counts from the lungs of mice surviving to this time-point indicates  
190 that, despite appearing clinically healthy, 41% (7/17) of *Ighm*<sup>tm1</sup> mice failed to clear the  
191 infection compared to 100% clearance in wild-type mice (Fig 5). Taken together, these  
192 results suggest that during early time-points in the local infected environment B cells can be  
193 pathogenic, while at later stages they are required to prevent chronic infection.

194

195 Increased susceptibility to *S. pneumoniae* could either be due to uncontrolled bacterial  
196 proliferation or be caused by an aberrant immune response to the pathogen. The bacterial  
197 titers from lungs and spleens of wild-type, p110δ<sup>D910A</sup> and p110δ<sup>E1020K-GL</sup> mice were similar  
198 at 24h post infection, suggesting that the different susceptibilities did not correlate with  
199 different abilities to control bacterial outgrowth during the early phase of infection  
200 (Supplementary Fig 7A). We observed a trend towards increased levels of TNFα, IL-6, IL-1β  
201 and IL-1α in the lung tissue of p110δ<sup>E1020K-GL</sup> mice at 24h post infection (Supplementary Fig  
202 7B). Consistent with this, the levels of TNFα, IL-6 and IL-1β were reduced in the lungs of  
203 wild-type mice treated with nemoralisib prior to *S. pneumoniae* infection (Supplementary Fig  
204 7C), indicating that, while PI3Kδ signaling affect the amount of pro-inflammatory cytokines  
205 produced in response to infection, the increase in response to PI3Kδ hyper-activation is  
206 modest.

207



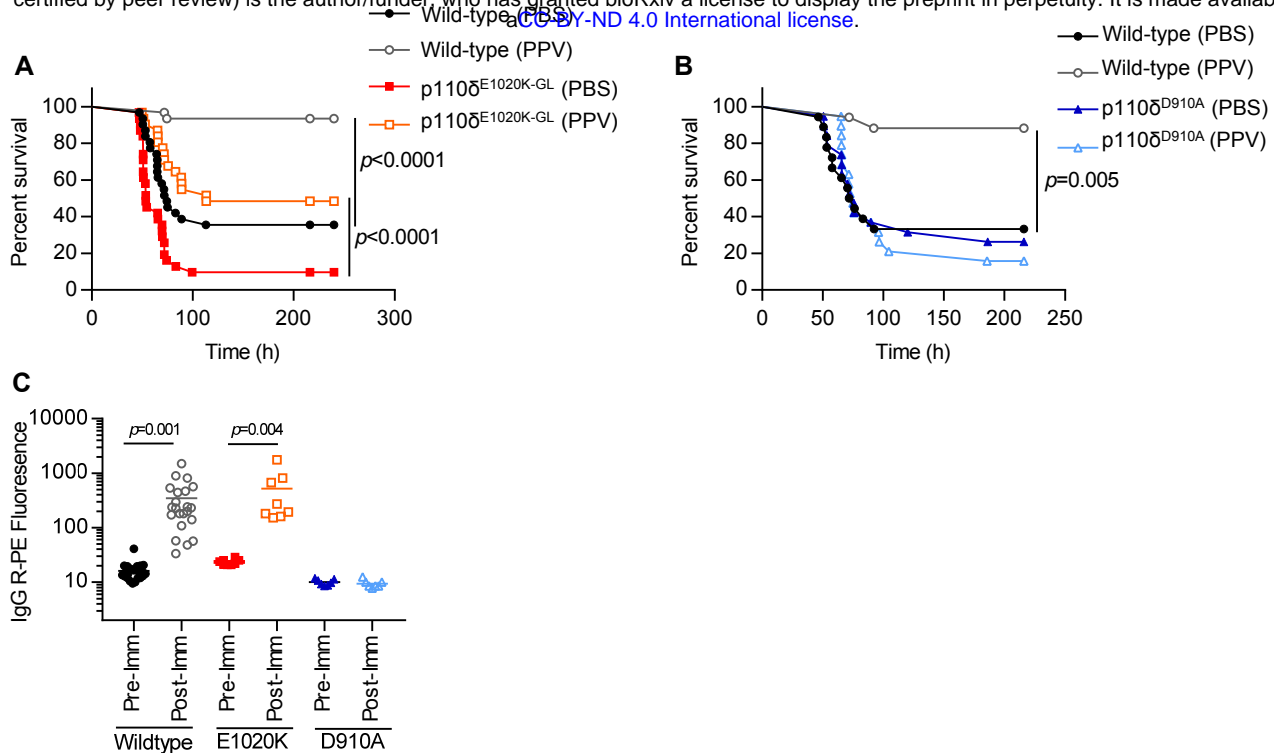

**Figure 4: PI3K $\delta$ <sup>E1020K-GL</sup> mice respond to Pneumovax and have normal antibody levels.**

**A-B:** Pneumovax (T-independent pneumococcal polysaccharide vaccine, PPV) partially protects p110 $\delta$ <sup>E1020K-GL</sup> mice against infection (A), while p110 $\delta$ <sup>D910A</sup> are not protected (B). **C:** p110 $\delta$ <sup>E1020K-GL</sup> mice produce normal levels of total IgG in response to Pneumovax immunisation (anti-pneumococcal serotype 4 shown) while p110 $\delta$ <sup>D910A</sup> mice do not respond to vaccine. (A: results from 3 independent studies combined, n=30; B: results from 2 independent studies combined, n=19; C: results from 2 independent studies combined: WT n=22; E1020K n=8; D910A n=6)

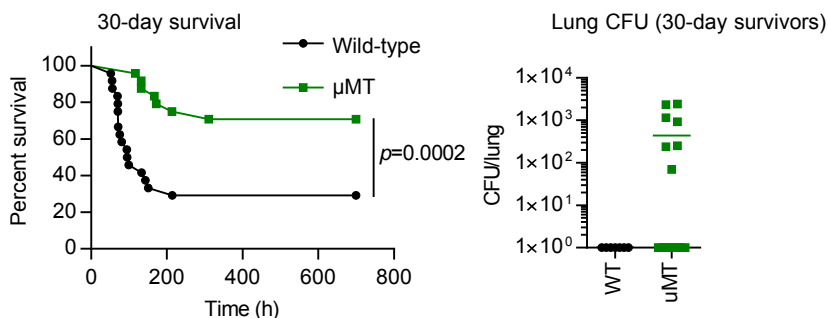

**Figure 5: B cells could drive increased pathology in response to *S. pneumoniae* infection, independent of bacterial clearance.**

*Ighm*<sup>tm1</sup> ( $\mu$ MT) mice show delayed disease progression and improved overall survival up to 30 days post *S. pneumoniae* infection, however 41% (7/17) surviving *Ighm*<sup>tm1</sup> mice failed to clear bacteria from the lung tissue at 30 days post infection compared to 100% clearance in surviving wild-type mice. (Data from 1 study, n=24)

208 CD19<sup>+</sup> B220<sup>-</sup> B cells produce high levels of IL-10 in response to *S. pneumoniae*  
209 infection in comparison with conventional CD19<sup>+</sup> B220<sup>+</sup> B cells

210 We hypothesized that increased susceptibility to *S. pneumoniae* infection can be mediated  
211 by a specific subpopulation of B cells. Therefore, we studied the B cell compartment in  
212 various tissues and found an atypical population of CD19<sup>+</sup>B220<sup>-</sup> B cells that was rare in wild-  
213 type mice, but significantly increased in p110δ<sup>E1020K-GL</sup> mice and was absent in p110δ<sup>D910A</sup>  
214 mice (Fig 6A). In the spleen and bone marrow, there was a 10- and 5-fold increase,  
215 respectively, in the numbers of CD19<sup>+</sup>B220<sup>-</sup> B cells in p110δ<sup>E1020K-GL</sup> mice compared to wild-  
216 type mice (Fig 6A). Infection with *S. pneumoniae* did not induce further expansion of  
217 CD19<sup>+</sup>B220<sup>-</sup> B cells in the lungs or other tissues examined 24h post-infection (Fig 6B).

218  
219 To ascertain if these cells were also present in the lungs and to distinguish resident from  
220 circulating cells, we labelled circulating leukocytes in wild-type and p110δ<sup>E1020K-GL</sup> mice by  
221 intravenous injection of biotin-conjugated anti-CD45. We then stained the lung homogenate  
222 with fluorochrome-conjugated anti-mouse CD45 and streptavidin, and used flow cytometry  
223 to distinguish tissue resident leukocytes from those present in the lung capillaries. We found  
224 a significant increase in the proportion and number of tissue-resident, but not circulating, B  
225 cells in p110δ<sup>E1020K-GL</sup> mice compared to wild-type mice. There was an increase in both  
226 CD19<sup>+</sup>B220<sup>+</sup> and CD19<sup>+</sup>B220<sup>-</sup> cells among the tissue-resident B cells which demonstrates  
227 that both populations can take residence in the lung (Supplementary Fig 8).

228  
229 Given that B cells from p110δ<sup>E1020K-GL</sup> mice drive susceptibility to *S. pneumoniae* in an  
230 antibody-independent manner, we sought to look at other properties of B cells. We found a  
231 trend towards lower IL-10 protein levels and a significant 10-fold decrease in IL-10 mRNA  
232 expression at 24h post infection in whole lung homogenates from wild-type mice treated  
233 with nemiralisib (Supplementary Fig 7C, D), indicating that PI3Kδ signaling can regulate IL-10  
234 levels in the lung post infection. IL-10 is an important immune-regulatory cytokine known to  
235 affect the course of *S. pneumoniae* infection<sup>27, 28</sup> and therefore increased IL-10 production  
236 could explain the B cell-dependent but antibody-independent effects seen in p110δ<sup>E1020K-GL</sup>  
237 mice. To investigate this further, we crossed the p110δ<sup>E1020K-GL</sup> and p110δ<sup>D910A</sup> mice with a  
238 highly sensitive IL-10 reporter (*Il10*<sup>ITIB</sup>) mouse<sup>29</sup>.

239  
240 At 24h post *S. pneumoniae* infection, the frequencies of the IL-10-producing B cells were  
241 significantly increased in the lungs of p110δ<sup>E1020K-GL</sup> *Il10*<sup>ITIB</sup> mice compared to in wild-type  
242 *Il10*<sup>ITIB</sup> mice (Supplementary Fig 7E). In addition, IL-10-producing B cells were barely  
243 detected in lungs from p110δ<sup>D910A</sup> mice (Supplementary Fig 7E). Frequencies of the IL-10-  
244 producing CD11b<sup>+</sup> myeloid, T and NK cells in lungs were variable, but not consistently  
245 increased in p110δ<sup>E1020K-GL</sup> mice (Supplementary Fig 7E). Further analysis of the CD19<sup>+</sup> B cell  
246 subset isolated from lungs and spleens at 24h post *S. pneumoniae* infection showed that the  
247 proportion of IL-10-producing cells was increased among the B220<sup>-</sup> B cell subset as  
248 compared to the B220<sup>+</sup> B cell subset in p110δ<sup>E1020K-GL</sup> mice (5% B220<sup>+</sup> vs 68% B220<sup>-</sup>) and  
249 wild-type mice (2% B220<sup>+</sup> vs 55% B220<sup>-</sup>) (Fig 6C). Furthermore, the proportion and absolute  
250 number of IL-10-producing CD19<sup>+</sup>B220<sup>-</sup> cells and CD19<sup>+</sup>B220<sup>+</sup> cells was increased in  
251 p110δ<sup>E1020K-GL</sup> mice compared to wild-type mice, while such IL-10-producing cells were  
252 virtually absent in p110δ<sup>D910A</sup> mice (Fig 6C). This indicates that CD19<sup>+</sup>B220<sup>-</sup> cells are the  
253 predominant population of B cells that produce IL-10 in a PI3Kδ-dependent manner.

254

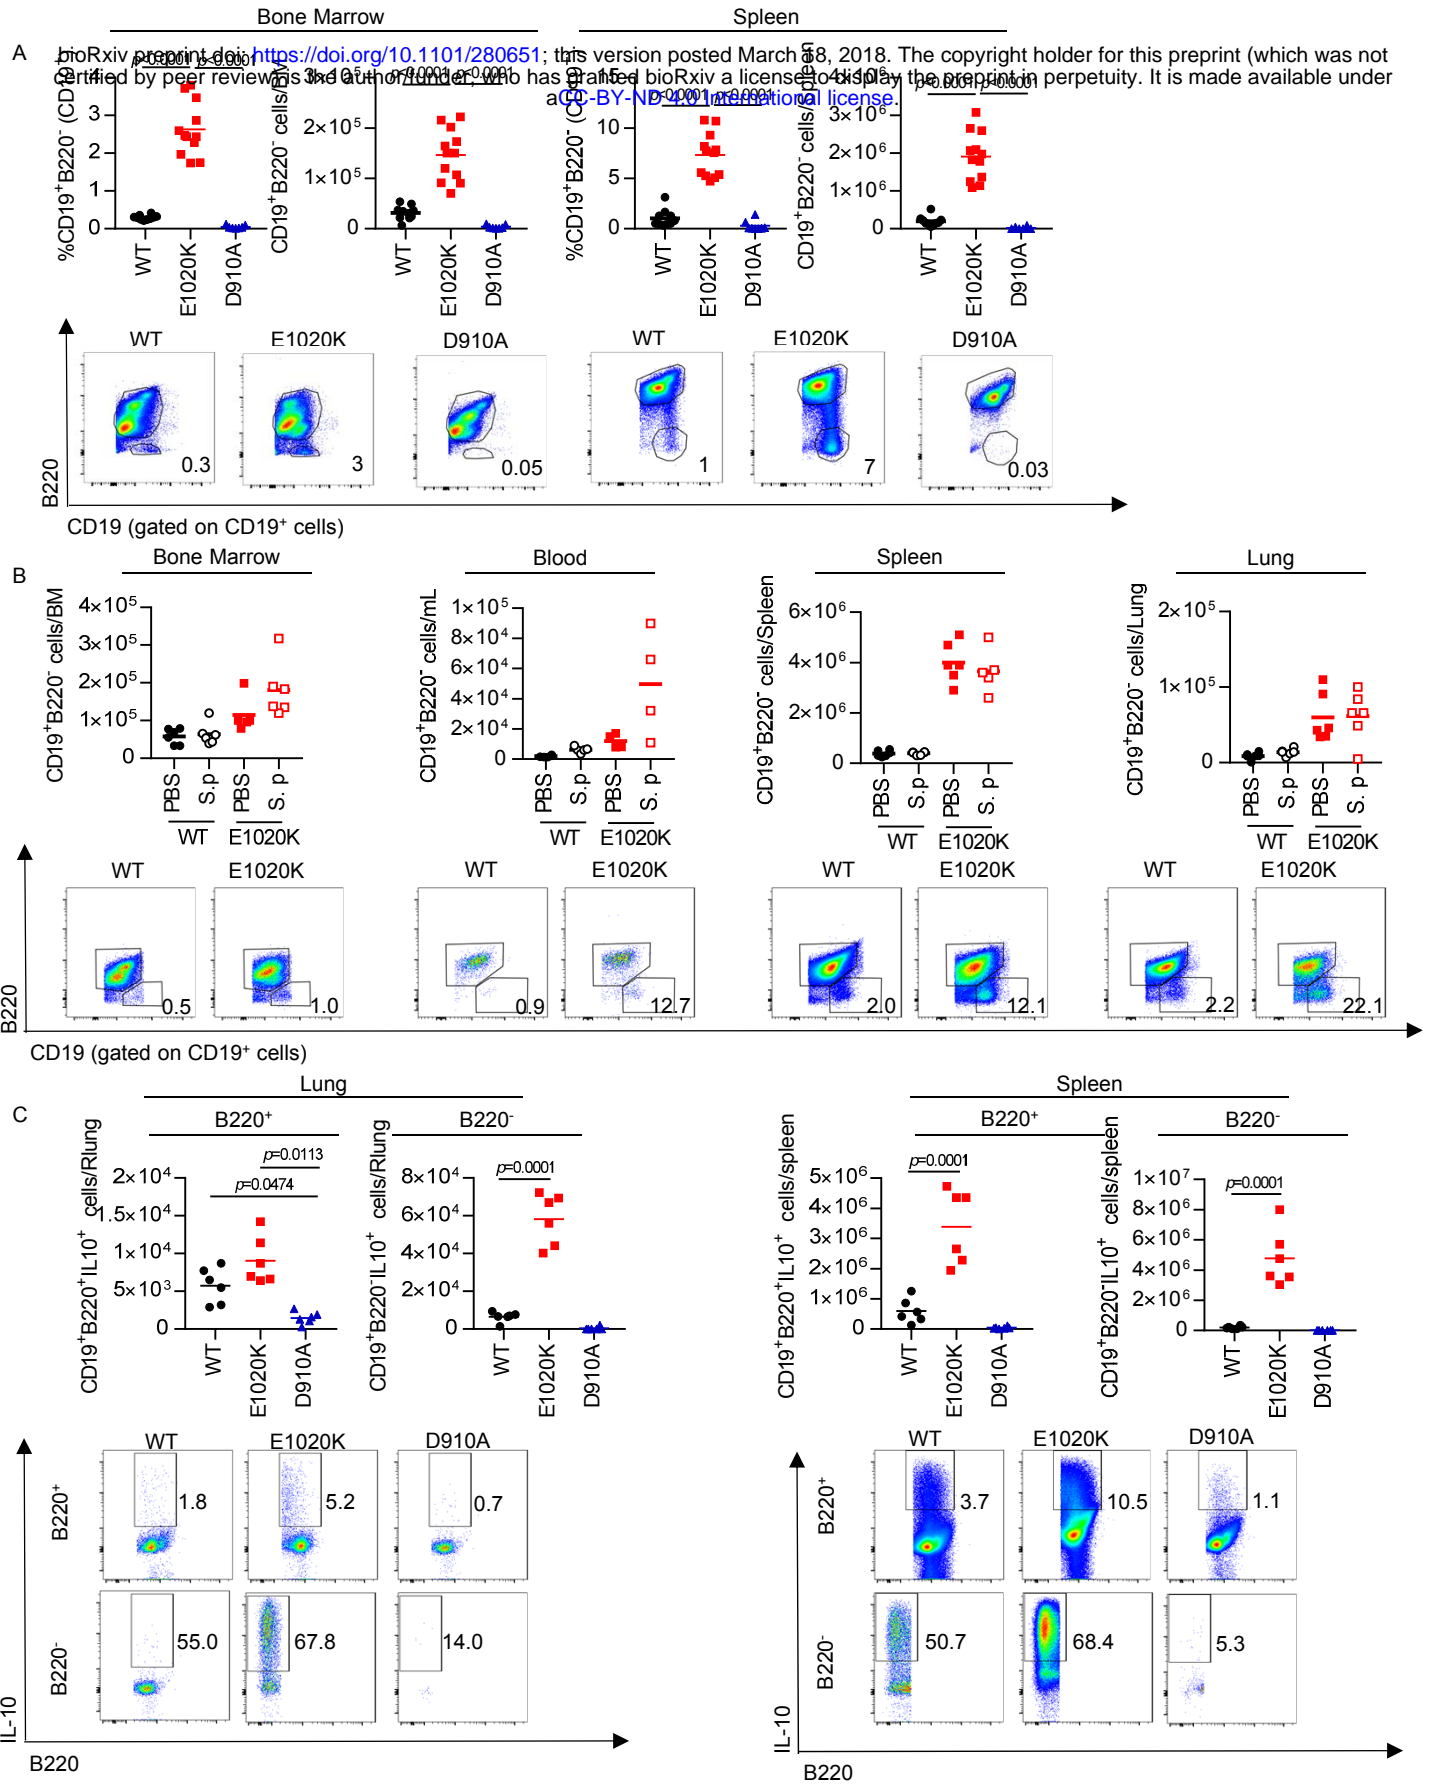

255 Previously, B cells that produce IL-10 have been termed B regulatory cells (Bregs)<sup>30</sup>. We  
256 sought to compare the phenotype of CD19<sup>+</sup>B220<sup>-</sup> IL-10-producing B cells with conventional  
257 IL-10-producing CD19<sup>+</sup>B220<sup>+</sup> Bregs described previously (Fig 7). Following *in vitro*  
258 stimulation for 5h and analysis of cell surface markers and intracellular IL-10 we found that  
259 there were clear phenotypic differences between conventional B220<sup>+</sup> Breg cells and the  
260 B220<sup>-</sup> B cells we describe here, including the differential expression of CD43 and IgM (Fig 7).  
261 The lack of B220 expression and low IgM expression differentiate the CD19<sup>+</sup>B220<sup>-</sup> IL-10-  
262 producing B cells from conventional B1 cells<sup>31</sup>.

263

#### 264 [Nemiralisib ameliorates the susceptibility to \*S. pneumoniae\* in p110δ<sup>E1020K</sup> mice](#)

265 Given that increased PI3Kδ activity in mice leads to increased mortality after *S. pneumoniae*  
266 infection we explored if nemiralisib would provide protection. Treatment of p110δ<sup>E1020K-GL</sup>  
267 mice with inhaled nemiralisib 24h prior to infection led to a 20% increase in survival. While  
268 nemiralisib treatment did not affect the numbers of CD19<sup>+</sup>B220<sup>-</sup> B cells, the proportion of IL-  
269 10 producing CD19<sup>+</sup>B220<sup>-</sup> B cells in the lungs were reduced in comparison to non-treated  
270 mice (Fig 8A). This was in keeping with our prior observations that nemiralisib treatment  
271 reduced IL-10 mRNA levels in the lung tissue of *S. pneumoniae* infected wild-type mice  
272 (Supplementary Fig 7D), suggesting a role for IL-10-producing CD19<sup>+</sup>B220<sup>-</sup> B cells in the  
273 PI3Kδ-dependent susceptibility to infection.

274

#### 275 [Nemiralisib treatment suppresses IL-10 production in B cells of APDS patients](#)

276 Cohort studies have shown that 75% of patients with APDS have elevated circulating  
277 transitional B cells (CD19<sup>+</sup>IgM<sup>++</sup>CD38<sup>++</sup>)<sup>14</sup>. Other studies have shown that such transitional B  
278 cells can produce high levels of IL-10<sup>32, 33</sup>. We obtained blood samples from patients with  
279 APDS and healthy controls and confirmed that all of these APDS patients had elevated  
280 proportions of transitional B cells (Fig 8B). We isolated PBMCs from two of these APDS  
281 patients and three healthy controls and stimulated them for 72h with anti-CD3 and IL-2<sup>32</sup>.  
282 After stimulation we found more IL-10-producing B cells and more IL-10-producing  
283 transitional B cells in PBMCs of APDS patients than in PBMCs of healthy controls, while  
284 treatment with nemiralisib effectively suppressed IL-10 production in these cells (Fig 8C).  
285 Therefore, in keeping with reduction of CD19<sup>+</sup>B220<sup>-</sup>IL-10 producing B cells in the mice,  
286 nemiralisib can also reduce IL-10 producing human transitional B cells.

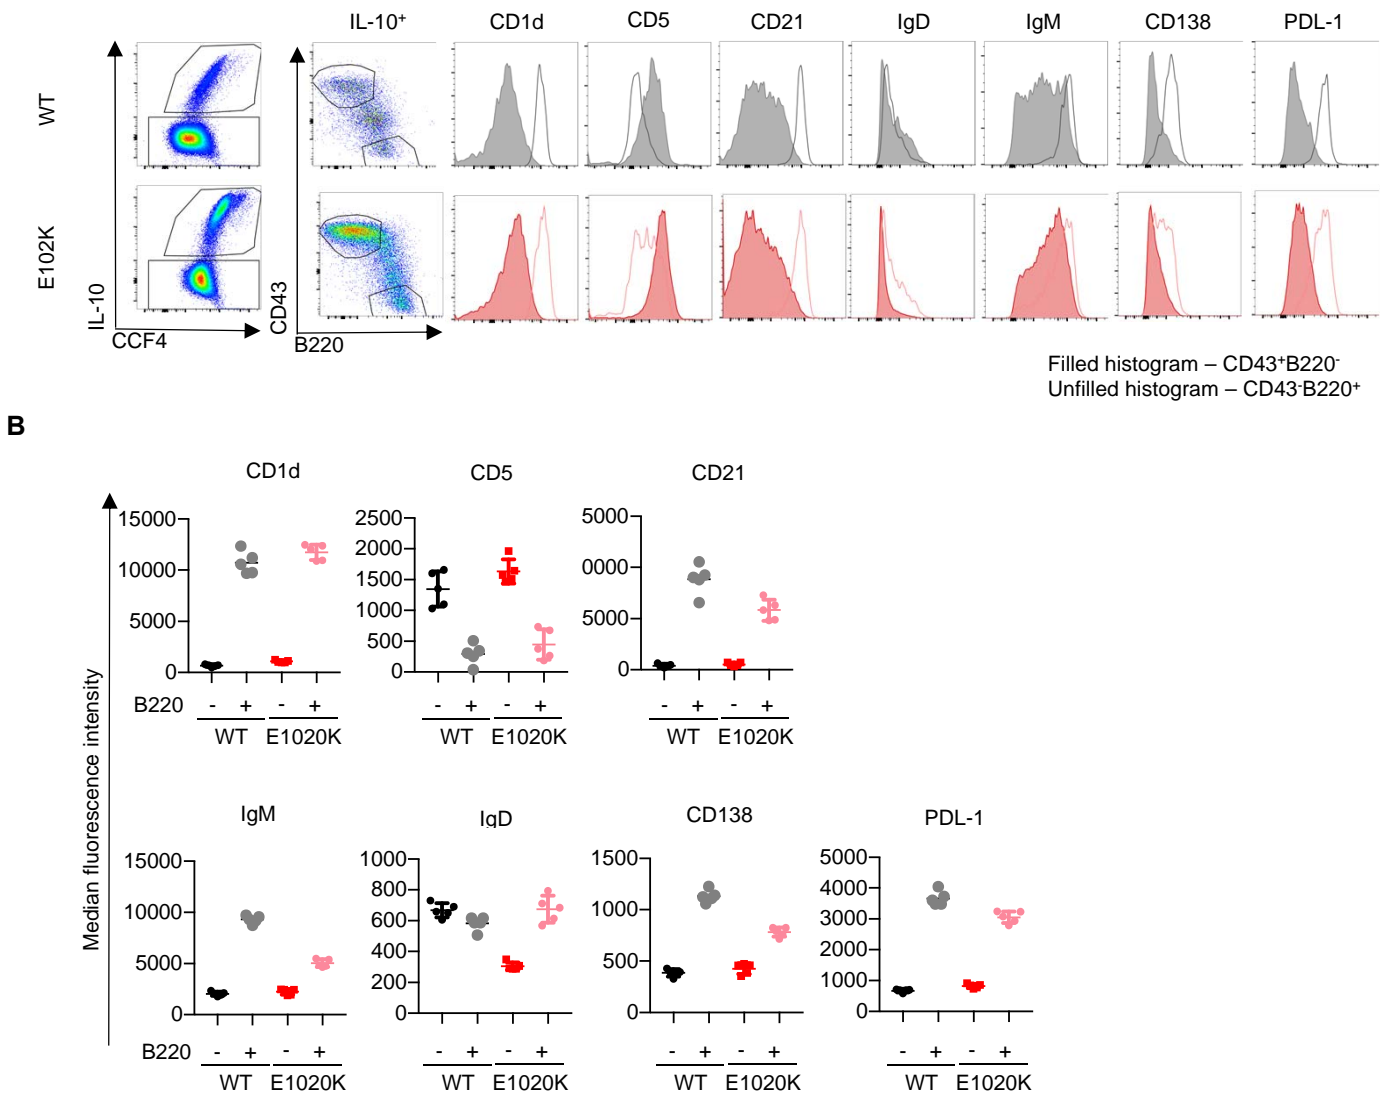

**Figure 7: IL-10 producing B220<sup>-</sup> B cell subset is a novel B cell subset, expanded in PI3K $\delta$ <sup>E1020K</sup> mice.**

In order to compare surface marker expression from B220<sup>-</sup> and B220<sup>+</sup> IL-10 producing B cells, splenocytes from *Il10*<sup>TT1B</sup> mice (WT and E1020K) were stimulated with LPS/PdBu/Ionomycin/Brefeldin A for 5 hours and then stained for cell surface markers as shown. **A**: After gating on IL-10 producing B cells, CD43<sup>+</sup>B220<sup>-</sup> cells were compared to CD43<sup>-</sup>B220<sup>+</sup> cells. Histograms highlighting the differential surface marker expression as measured by median fluorescence intensity (MFI) between these populations are shown. **B**: Comparison of surface marker MFI show that CD19<sup>+</sup> B220<sup>-</sup> IL-10<sup>+</sup> B cells express: CD43<sup>+</sup>CD5<sup>int/+</sup> CD23<sup>-</sup>CD21<sup>-</sup>CD1d<sup>lo/int</sup> IgM<sup>+</sup>/IgD<sup>lo/-</sup> PDL1<sup>-</sup>CD138<sup>-</sup> as opposed to conventional Bregs expressing: CD19<sup>hi</sup> B220<sup>hi</sup> IL-10<sup>+</sup> CD43<sup>-</sup> CD5<sup>Var</sup>CD23<sup>-</sup>CD21<sup>++</sup>CD1d<sup>hi</sup> IgM<sup>hi</sup> IgD<sup>Var/lo</sup> PDL1<sup>+</sup>CD138<sup>int</sup>. (Data from 1 experiment, n=5)

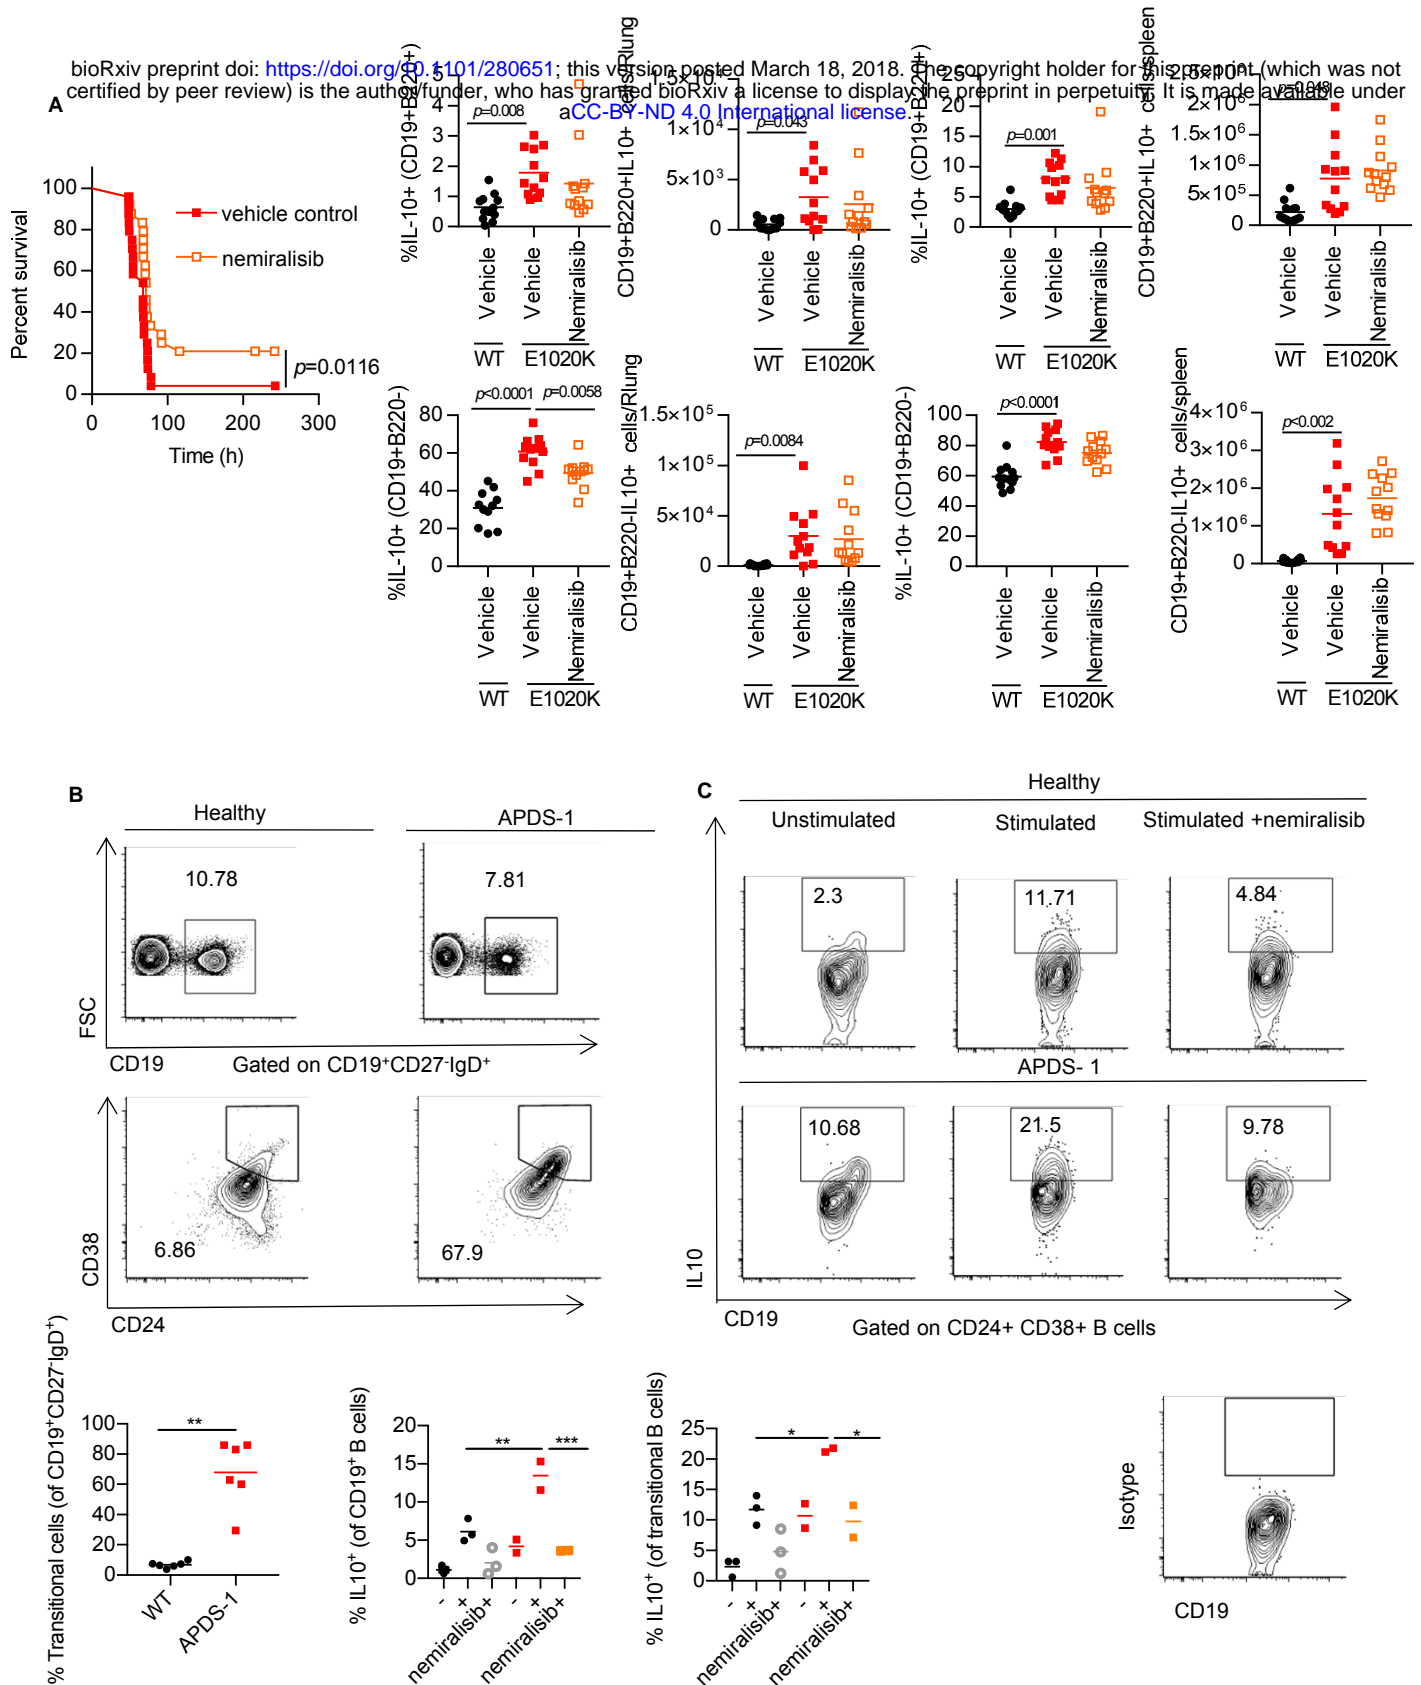

**Figure 8: Nemiralisib treatment reduces the proportion of IL-10 producing B cells in mice and humans.**

**A:** Prophylactic treatment with nemiralisib improved survival in p1105<sup>E1020K-GL</sup> mice and was associated with a significant reduction in the proportion of IL-10 producing B220<sup>-</sup> B cells in the lung at 24h post infection. (A: Combined data from two independent studies, survival n=24; lung tissue analysis n=12) **B:** Blood from patients with APDS (n=6) and healthy controls (n=6) was obtained and the B cell phenotype was determined by flow cytometry. Transitional B cells are identified as CD19<sup>+</sup>IgD<sup>+</sup>CD27<sup>-</sup>CD24<sup>+</sup>CD38<sup>+</sup>. Representative contour plots with outliers show the mean proportions of cells. **C:** Freshly isolated PBMCs were unstimulated or stimulated with plate bound anti-CD3 and anti-IL-2 for 72h in the presence or absence of nemiralisib (n=2-3). The proportion of IL-10 producing cells among the total B cell and transitional B cell populations was determined by flow cytometry. Representative contour plots with outliers show mean proportions of IL-10 producing cells. (Combined data from 2 independent experiments).

## 287 Discussion

288 Our results show that enhanced PI3K $\delta$  signaling leads to the increased susceptibility to *S.*  
289 *pneumoniae* infection through a B cell-dependent, but antibody-independent mechanism.  
290 We found an expansion of an aberrant B cell population which could be equivalent to the  
291 elevated transitional B cell population found in APDS patients. These cell populations may  
292 have a detrimental effect during the early phase of *S. pneumoniae* infection.  
293

### 294 B cells drive increased susceptibility to *S. pneumoniae* infection in p110 $\delta$ <sup>E1020K</sup> mice

295 In this study, we show that B cells can increase the susceptibility to *S. pneumoniae* infection  
296 during the first few hours after exposure. Mice were more susceptible to *S. pneumoniae*  
297 infection when the hyperactive p110 $\delta$ <sup>E1020K</sup> mutation was expressed in B cells. By contrast,  
298 mice expressing the p110 $\delta$ <sup>E1020K</sup> mutation only in T cells were protected. The basis for the  
299 protection remains unknown and is the focus of ongoing study. The p110 $\delta$ <sup>E1020K</sup> mice have  
300 increased numbers of T<sub>FH</sub> and Treg cells and the conventional T cells have a more activated  
301 phenotype. A recent study has documented a population of lung-resident innate Th17 cells  
302 that confers protection against re-challenge with *S. pneumoniae*<sup>34</sup>. Whether such a subset is  
303 affected by PI3K $\delta$  activity and can also protect against immediate challenge is not known.  
304 However, we did not detect increased proportions of Th17 cells after infection. Regardless  
305 of the mechanism, the protection offered by T cells was overcome by the adverse effects of  
306 B cells in p110 $\delta$ <sup>E1020K-GL</sup> mice.  
307

308 We describe a subset of B cells which lack the common B cell marker B220, and whose  
309 abundance is correlated with the susceptibility to *S. pneumoniae* infection. Moreover, we  
310 show that the development of this CD19<sup>+</sup>B220<sup>-</sup> B cell subset is highly dependent on the level  
311 of activity of PI3K $\delta$ . Susceptibility to *S. pneumoniae* infection was not altered in p110 $\delta$ <sup>D910A</sup>  
312 mice as compared to wild-type mice. Kinase-dead p110 $\delta$ <sup>D910A</sup> mice lack natural and anti-  
313 capsular antibodies which may make them more susceptible, however, their lack of  
314 CD19<sup>+</sup>B220<sup>-</sup> B cells may counterbalance this antibody deficiency, such that overall the  
315 mutation has little net effect on *S. pneumoniae* susceptibility.  
316

### 317 PI3K $\delta$ signaling controls IL-10 production in B cells

318 A large proportion of the CD19<sup>+</sup>B220<sup>-</sup> B cells produced IL-10. Although increased IL-10 could  
319 potentially reduce the production of inflammatory cytokines, we found similar or increased  
320 levels of TNF $\alpha$ , IL-6 and IL-1 in the lungs of p110 $\delta$ <sup>E1020K</sup> mice and no difference in CFU counts  
321 at 24h post infection.  
322

323 One of the defining characteristics of APDS patients is an increased proportion of  
324 CD24<sup>+</sup>CD38<sup>+</sup> B cells defined as transitional B cells<sup>10-12, 14, 15</sup>. Intriguingly, production of IL-10  
325 is a characteristic of these B cells as well. High IL-10 levels in response to secondary *S.*  
326 *pneumoniae* infection following influenza A is associated with increased lethality when  
327 compared to a primary *S. pneumoniae* infection, and importantly, the outcome of a  
328 secondary *S. pneumoniae* infection is improved by IL-10 neutralisation<sup>27, 28</sup>. This indicates  
329 that, while IL-10 is required for normal immune regulation and resolution of inflammation<sup>35</sup>,  
330 excess IL-10 during the early stages of *S. pneumoniae* infection could have an acute  
331 detrimental effect. This fits with our observation that nemralisib treatment improved the  
332 outcome of mice infected with *S. pneumoniae* and reduced IL-10 mRNA levels in the lung.

333 Further studies are required to investigate the time and location specific effects of B cell  
334 dependent IL-10 production, keeping in mind that B cells have the potential to produce a  
335 number of different cytokines (such as IL-6, TNF- $\alpha$ , and IL-35) that could affect *S.*  
336 *pneumoniae* susceptibility<sup>36</sup>.

337

338 We postulate that the transitional B cells which are expanded in APDS patients may not just  
339 be precursors to more mature B cells, but also include cells that are functionally equivalent  
340 to the CD19<sup>+</sup>B220<sup>-</sup> cells that we have identified in p110 $\delta$ <sup>E1020K</sup> mice and thus may also  
341 contribute to the increased susceptibility to *S. pneumoniae* infection and hence to the high  
342 incidence of bronchiectasis characteristic of this disease<sup>15</sup>. In this context, it is interesting  
343 that CD19<sup>+</sup>B220<sup>-</sup> B cells had previously been described as immature progenitors in the bone  
344 marrow<sup>37</sup>, rather than a functional PI3K $\delta$  dependent subset found in peripheral tissues as  
345 we describe here. Although the CD19<sup>+</sup>B220<sup>-</sup> B cells we describe resemble B1 cells by some  
346 criteria, such as the expression of CD5 and CD43, their lower IgM expression, lack of B220  
347 and distribution pattern suggest that they are related but distinct to conventional B1 and  
348 B10 cells<sup>30, 31</sup>. A similar subset has previously been described as being dependent on CD19  
349 and increased in the absence of PTEN expression and PTEN haploinsufficiency in humans can  
350 lead to an APDS-like syndrome<sup>38-40</sup>.

351

352 Our results do not question the important role that antibodies play in the protection against  
353 *S. pneumoniae* and other encapsulated bacteria. Indeed, in wild-type mice, immunization  
354 with Pneumovax offered complete protection. Rather, our results highlight a hitherto  
355 underappreciated subset of B cells that increase the pathological response shortly after  
356 infection. It remains to be determined whether this is a feature of the B cells being lung-  
357 resident (and hence among the first cells of the immune system to encounter the invading  
358 pathogens) and by which mechanisms B cells either condition lung epithelia to become  
359 more susceptible to invasion of *S. pneumoniae*, reduce the clearance of *S. pneumoniae* by  
360 phagocytes and/or increase the collateral adverse effects of the early innate immune  
361 response to this pathogen. This is in keeping with the increasing realization that B cells are  
362 important sources of different cytokines and can modulate immune responses  
363 independently of their capacity to present antigen and produce antibodies<sup>36</sup>.

364

### 365 [Therapeutic implications](#)

366 Intriguingly, the inhaled inhibitor nemiralisib offered protection in not just in p110 $\delta$ <sup>E1020K</sup> but  
367 also in wild-type mice infected with *S. pneumoniae*, when administered prior to infection.  
368 This result suggests that preventive inhibition of PI3K $\delta$  can be beneficial not only just in the  
369 context of APDS, but also in other conditions associated with PI3K $\delta$  hyperactivation, such as  
370 COPD<sup>41</sup>.

371

372 The results presented herein are relevant to our understanding and the potential treatment  
373 of patients with APDS. Clinical trials are currently ongoing using both inhaled and systemic  
374 PI3K $\delta$  inhibitors (NCT02593539, NCT02435173 and NCT02859727). Systemic use of PI3K $\delta$   
375 inhibitor has shown promise in reduction of lymphoproliferation and immune cell  
376 aberrations in patients with APDS, however, no comments were made regarding recurrent  
377 infections or respiratory manifestations<sup>42</sup>. Systemic use of PI3K $\delta$  inhibitors in malignancies  
378 have been associated with serious side effects, including colitis<sup>43</sup>. It would therefore be of  
379 importance to determine whether inhaled PI3K $\delta$  inhibitors could alleviate the respiratory



380 manifestations of APDS while reducing the risk of the adverse effects associated with  
381 systemic inhibition. Moreover, the results may also be relevant to other conditions, such as  
382 COPD<sup>17</sup>, where PI3K $\delta$  may be activated by non-genetic mechanisms. Overall, our findings  
383 suggest that in subjects with increased PI3K $\delta$  activity prophylactic administration of PI3K $\delta$   
384 inhibitors may help alleviate the course of *S. pneumoniae* infection.

## 385 Materials and Methods

### 386 Mouse strains and gene targeting

387 The p110 $\delta^{E1020K}$  mice were generated by Ozgene, Australia using homologous  
388 recombination in ES cells. A duplicate sequence corresponding to the last coding exon in  
389 *Pik3cd* and carrying the E1020K mutation was flanked by loxP sites and inserted 3' to the  
390 wild-type sequence. Upon Cre-mediated recombination, the wild-type sequence is replaced  
391 by the mutant E1020K sequence. p110 $\delta^{D910A}$ , *Cd4<sup>cre</sup>*, *Mb1<sup>cre</sup>*, *Lyz2<sup>cre</sup>*, *Ighm<sup>tm1</sup>* ( $\mu$ MT) and  
392 *Il10<sup>IT1B</sup>* mice have been described previously<sup>19, 26, 29, 44-46</sup>. Throughout the study, the  
393 p110 $\delta^{E1020K}$  allele was heterozygous whereas the p110 $\delta^{D910A}$  alleles were homozygous.  
394 Genotyping was performed by Transnetyx (Cordova, TN).

395

### 396 *S. pneumoniae* stock preparation

397 *Streptococcus pneumoniae* (TIGR4, serotype 4 (provided by Professor Jeremy Brown,  
398 University College, London)) was grown to mid-log phase (OD<sub>500</sub> = 0.5-0.7) in Todd-Hewitt  
399 broth (Oxoid) supplemented with 0.5% yeast extract (Oxoid) at 37°C, 5% CO<sub>2</sub>. The bacteria  
400 were collected by centrifugation, and resuspended in PBS/20% glycerol (Sigma-Aldrich) prior  
401 to freezing in liquid N<sub>2</sub> and storage at -80 °C. Stocks were assessed for viable CFU counts and  
402 homogeneity by plating out serial dilutions of three frozen samples on blood agar plates (LB  
403 agar, supplemented with 5% defibrinated sheep blood (Oxoid)) after incubation for 24h at  
404 37 °C, 5% CO<sub>2</sub>. *S. pneumoniae* colonies were confirmed by the presence of an  $\alpha$ -hemolytic  
405 zone and sensitivity to optochin (Sigma-Aldrich). Virulent stocks were maintained by  
406 performing an *in vivo* passage every 6-12 months.

407

### 408 *S. pneumoniae* infections

409 Frozen stocks were thawed and washed twice by centrifugation in sterile PBS before  
410 resuspending at 4x10<sup>7</sup> CFU/mL in PBS. The suspension was kept on ice at all times, and used  
411 for infection within 2h of thawing (no loss of viability was observed under these conditions).  
412 Mice were lightly anaesthetized by inhalation of 3% isoflurane and maintained with 2%  
413 isoflurane. Mice (males and females aged 8-12 weeks) were infected intranasally with 50 $\mu$ L  
414 *S. pneumoniae* suspension containing 2x10<sup>6</sup> CFU. Animals were observed to confirm  
415 inhalation of the dose and full recovery from anesthesia. The infection dose was routinely  
416 confirmed by plating out serial dilutions of the inoculum on blood agar plates, as described  
417 above.

418

### 419 Survival studies

420 Mice were infected with *S. pneumoniae* as described above. Pre-infection body weights  
421 were recorded and animals were weighed daily post infection. Animals were monitored  
422 three times a day for a period of 10 days post infection. Disease progression was assessed  
423 by assigning clinical scores without knowledge of the individual genotypes: 0: Healthy; 1:  
424 mild clinical signs; 2: Up to 2 moderate clinical signs; 3: up to 3 moderate signs. Animals  
425 were culled when they showed >25% bodyweight loss or reach score 3. The most frequently  
426 observed clinical signs were piloerection, hunched posture, tremor, and labored breathing.  
427 At the study end-point, animals were culled and terminal blood samples collected.

428

#### 429 Bone Marrow transfer

430 A single cell suspension of p110δ<sup>E1020K-B</sup> and wild-type (C57Bl/6.SJL) donor bone marrow was  
431 prepared in sterile HBSS (Sigma-Aldrich) as described below (Isolation of immune cells from  
432 mouse tissues). Cells from two sex-matched donors were pooled. RAG2<sup>-/-</sup> recipient mice  
433 were supplied with 4mg/mL Neomycin (Sigma-Aldrich) in drinking water before sub-lethal  
434 irradiation (one dose of 500Rads over 63 seconds), and received 3x10<sup>6</sup> donor cells by  
435 intravenous (tail vein) injection. Neomycin treatment was maintained for 4 weeks post  
436 transfer, and after 8 weeks reconstitution was confirmed by analyzing tail bleeds.

437

#### 438 Vaccination

439 For vaccine studies, mice were immunized with Pneumovax II (pneumococcal  
440 polysaccharide vaccine, serotypes: 1-5, 6B, 7F, 8, 9N, 9V, 10A, 11A, 12F, 14, 15B, 17F, 18C,  
441 19F, 19A, 20, 22F, 23F and 33F; Sanofi Pasteur MSD). One 0.5mL dose containing 50µg/mL  
442 of each serotype was diluted 1:12.5 in sterile PBS to 4µg/mL. Mice were given one 100µL  
443 (0.4µg) dose by intraperitoneal injection, 14 days before infection with *S. pneumoniae*.  
444 Blood samples were taken from the tail vein prior to vaccination and 14 days after  
445 vaccination into serum collection tubes (BD microtainer, SST) samples were centrifuged at  
446 15000xg for 5 min and the serum stored at -20°C until analysis.

447

#### 448 Nemiralisib treatment

449 The PI3Kδ inhibitor nemiralisib (GSK2269557) was supplied by GSK, Respiratory Refractory  
450 Inflammation DPU, UK. The nemiralisib suspension was prepared on the day of use in 0.2%  
451 Tween80, and administered intranasally to mice twice daily at 0.2mg/kg in a total volume of  
452 50µL, as described above (*S. pneumoniae* infections). Unless otherwise specified, the first  
453 dose was given 24h before infection, and treatment was maintained for the duration of the  
454 study.

455

#### 456 Isolation of immune cells from mouse tissues

457 Mice were euthanized by CO<sub>2</sub> inhalation and cervical dislocation. Lungs were perfused with  
458 10mL cold PBS through the right ventricle, and collected into cold PBS. Lungs were  
459 homogenized using a GentleMACS tissue dissociator and mouse lung dissociation enzyme kit  
460 from Miltenyi according to the manufacturer's instructions. The homogenate was transferred  
461 to 15mL tubes (BD Falcon) and washed by centrifugation (500xg) in 10mL cold PBS. The  
462 pellet was resuspended in 3mL 37.5% isotonic Percoll (Sigma) at room temperature and  
463 centrifuged at 650xg for 20min with low acceleration and no brake. The supernatant  
464 including tissue debris was removed, and the cell pellet was washed and resuspended in  
465 cold PBS. Where CFU counts were required, the right lung was processed as described  
466 above and the left lung was processed for CFU counts as described below. Bone marrow  
467 cells were collected by flushing cold PBS through femurs and tibias collected, filtered  
468 through 40µm cell strainers and washed by centrifugation in 5mL PBS. Spleens, thymus and  
469 peripheral lymph nodes were homogenized in PBS by pushing the tissue through 40µm cell  
470 strainers (BD) using a syringe plunger. The cell suspension was then transferred to a 15ml  
471 Tube (BD falcon) and washed once in 5ml cold PBS. For blood, bone marrow and spleen, red  
472 blood cells (RBC) were lysed using hypotonic ammonium chloride RBC lysis buffer (Sigma).  
473 Lysing was quenched with cold PBS and the cells were collected by centrifugation. Single  
474 cell suspensions were processed for flow cytometry as described below.

475

476 *S. pneumoniae* CFU counts

477 Lungs were homogenized in 1ml PBS using a Bullet Blender using 3x 3mm steel beads: speed  
478 8, 3min (Next Advance, USA). Spleens were homogenized as described above in 2mL PBS.  
479 Serial dilutions (10-fold) were performed for spleen and lung homogenates, and samples  
480 were plated out on blood agar as described above. Plates were incubated for 24h at 37°C  
481 and *S. pneumoniae* colonies were counted.

482

483 *In vitro* stimulation of mouse B cells

484 Splenocytes were isolated from naïve wild-type, p110δ<sup>E1020K-GL</sup> and p110δ<sup>D910A</sup> mice that had  
485 been crossed with the *Il10*<sup>ITIB</sup> reporter line as described above and the total cell count was  
486 obtained using a CASY counter. The cells were resuspended in complete RPMI (RPMI plus  
487 5% (v/v) FCS, 50 μM β-mercaptoethanol and 100 μg/ml penicillin and streptomycin) and  
488 plated at 5x10<sup>6</sup> cells in 100μL per well in a 96-well U bottom plate. The cells were stimulated  
489 with 10 ng/ml LPS, 50ng/ml PdBu (Sigma, USA), 0.25 μg/ml Ionomycin (Sigma, USA) and 1  
490 μl/ml of Brefeldin A (eBioscience) for 5h at 37 °C. The cells were then processed for IL-10  
491 detection and flow cytometry as described below.

492

493 Detection of IL-10 in *Il10*<sup>ITIB</sup> reporter mice:

494 Single cell suspensions from *S. pneumoniae* infected mice or *in vitro* stimulated cells were  
495 prepared as described above. The cells were incubated with 3.3μM CCF4-AM, a  
496 Fluorescence Resonance Energy Transfer substrate for β-lactamase (LiveBLazer kit,  
497 Invitrogen), and 3.6mM probenecid (Sigma) in complete RPMI for 90min at 29°C, as  
498 previously described<sup>29</sup>, then placed on ice and collected by centrifugation. Cells were then  
499 processed for flow cytometry as described below.

500

501 Flow cytometry

502 Antibodies used for flow cytometry are listed in Table 1. Single cell suspensions were  
503 stained using an antibody master mix in PBS/0.5%BSA for 40min at 4°C. Cells were washed  
504 and fixed in 4% paraformaldehyde (Biolegend) for 10min at room temperature before  
505 washing 2x in PBS/0.5%BSA. For intracellular detection of IL-10 in human samples, the cells  
506 were fixed and permeabilized with Cytofix/Cytoperm buffer (BD Biosciences, USA) following  
507 surface staining. For FoxP3 staining, the eBioscience FoxP3/Transcription Factor staining  
508 Buffer Set was used according to the manufacturer's instructions. Non-fluorescent counting  
509 beads (AccuCount Blank Particles 5.3μm; Spherotech, USA) were added to quantify absolute  
510 cells numbers. Samples were kept at 4°C until analysis (BD Fortessa5). Analysis was carried  
511 out using FlowJo (Treestar) analysis software.

512

513 *In vitro* stimulation of human B cells

514 Freshly isolated PBMCs from patients and control individuals were stimulated with 0.5μg/ml  
515 purified plate bound anti CD3 monoclonal antibody (clone-OKT3) (Invitrogen) and 20ng/ml  
516 recombinant human IL2 in presence or absence of, the p110δ inhibitor, nemiralisib (10nM)  
517 for 72h. This stimulation led to the activation of CD40L (CD154) on CD4 T cells. The  
518 interaction between CD40L on CD4 T cells with CD40 on B cells resulted in the production of  
519 IL-10 in regulatory B cells. For a final stimulation 50ng/ml PdBu (sigma, USA), 0.25 μg/ml  
520 ionomycin (Sigma, USA) and 1μl/ml of Brefeldin A (eBioscience) were also added for the last  
521 4h. Cells were washed, surface stained, fixed and permeabilized with Cytofix/Cytoperm  
522 buffer (BD Biosciences, USA) for the intracellular detection of IL-10 as described above.

523

#### 524 Natural Antibody ELISA

525 Anti-phosphorylcholine IgM and IgG levels were assessed in serum from naïve mice. Blood  
526 samples were collected by cardiac puncture and serum collected as described above. NUNC  
527 Maxisorp ELISA plates were coated overnight at 4°C with 20µg/mL phosphorylcholine-BSA  
528 (BioSearch) in sodium bicarbonate coating buffer (pH9) (Biolegend) (100µL/well). Plates  
529 were washed 4x with PBS/0.2% Tween20 followed by blocking for 1h at room temperature  
530 in PBS/1%BSA. Serum samples were diluted 1:10 in PBS/1% BSA and pooled WT serum was  
531 diluted from 1:5 to 1:400 to confirm the linear range of the assay. After removing the  
532 blocking solution, samples were added at 100µL/well, and the plates were incubated  
533 overnight at 4°C. The plates were then washed 4x in PBS/0.2%Tween20. Polyclonal HRP  
534 conjugated goat-anti-mouse IgM (abcam ab97023) or IgG (abcam ab97230) was diluted  
535 1:5000 in PBS/1% BSA, added at 100µL per well and the plates were incubated for 2h at  
536 room temperature. The plates were washed 6x with PBS/0.2%Tween20, TMB substrate  
537 (Biolegend) was added at 100µL per well and incubated for 5-10 min at room temperature.  
538 The reaction was stopped by adding 50µL 2N H<sub>2</sub>SO<sub>4</sub> solution. Absorbance was read at  
539 450nm (Fluostar omega, BMG Labtech).

540

#### 541 Tissue resident cell analysis (lung)

542 Mice received an intravenous (tail vein) injection of 3µg anti-mouse CD45 conjugated to  
543 biotin (Biolegend, clone 30-F11) in 100µL PBS. 4min after injection animals were killed and  
544 the lungs were collected into cold PBS without prior perfusion. Lungs were then finely  
545 minced using a scalpel blade and the pushed through a 100µm cell strainer (BD) the  
546 homogenate was collected in a 15mL tube (BD falcon) and washed in 10ml cold PBS. The  
547 pellet was resuspended in 3mL 37.5% isotonic Percoll (Sigma) at room temperature and  
548 processed as described above. The cells were stained for flow cytometry as described  
549 above, including streptavidin APC to identify anti-CD45-Biotin labelled circulating cells.

550

#### 551 Cytokine analysis

552 Cytokine levels were measured in the supernatant from lung homogenates prepared for  
553 CFU analysis. The homogenates were centrifuged for 1min at 10000xg to remove tissue  
554 debris. Samples collected from wild-type mice treated with nemiralisib were analyzed using  
555 Meso Scale Discovery mouse Th1/Th2 9-plex ultrasensitive kits, according to manufacturer's  
556 instructions. Samples collected from genetically modified mice were analyzed using the flow  
557 cytometry based Legendplex mouse inflammation 13-plex panel (Biolegend).

558

#### 559 Gene Array

560 Wild-type mice were treated with nemiralisib and infected with *S. pneumoniae* as described  
561 above. At 24h post infection, whole lungs were collected and snap frozen in liquid nitrogen.  
562 Samples were randomized and analyzed (Affymetrix Genechip Mouse genome 430 2.0  
563 Array) by Expression Analysis, Quintiles Global Laboratories. Data analysis was performed by  
564 Computational Biology and Statistics, Target Sciences, GlaxoSmithKline, Stevenage. Data  
565 was normalised using the robust multiarray average method<sup>47</sup> and quality checked in  
566 R/Bioconductor<sup>48</sup> using the *affy* package<sup>49</sup>. A linear model was fitted to the RMA  
567 normalised data for each probset and differential expression analysis was conducted in the  
568 ArrayStudio software (Omicsoft Corporation). P-values were false discovery rate corrected  
569 by the method of Benjamini and Hochberg<sup>50</sup>. Probes with an absolute fold change >1.5 and

570 an adjusted p-value <0.05 were called significant. The data been deposited in the National  
571 Center for Biotechnology Information Gene Expression Omnibus (GEO) and are accessible  
572 through GEO series accession number GSE109941.

573

#### 574 Luminex antibody analysis

575 Measurement of IgG recognizing pneumococcal polysaccharide of 13 serotypes was  
576 performed as described previously<sup>51</sup>. The assay was modified in order to measure murine  
577 IgG as follows: 50µl of 1:10 diluted mouse sera was added to each well containing the  
578 pneumococcal polysaccharides coupled to microspheres and the secondary antibody used  
579 was 50µl of 10µg/ml goat F(ab')<sub>2</sub> anti-mouse IgG (H+L)- R-phycoerythrin (Leinco  
580 Technologies, Inc). R-PE fluorescence levels were recorded for each serotype and median  
581 fluorescence intensities were compared for the different genotypes.

582

#### 583 PIP<sub>3</sub> quantification

584 CD4 and CD8 cells were isolated from mouse splenocytes using immunomagnetic negative  
585 selection by biotinylated cocktail of antibodies and Streptavidin dynabeads (Invitrogen). T  
586 cells were stimulated with anti-CD3 (1mg/ml), (145-2c11, Biolegend) anti- CD28 (2µg/ml),  
587 (35.51, Biolegend) antibodies followed by crosslinking with anti- Armenian hamster IgG (10  
588 µg/ml, Jackson ImmunoResearch labs). Cells were stimulated for 1 min at 37°C. B cells were  
589 similarly isolated from mouse splenocytes and stimulated for 1 min at 37 °C with anti- IgM  
590 2µg/ml (AffinPure F(ab')<sub>2</sub> Fragment goat anti-mouse IgM from Jackson Immuno-Research  
591 labs).

592

593 After stimulation of the cells, we terminated the reactions by addition of 750µl kill solution  
594 (CHCl<sub>3</sub>:MeOH:1M HCL (10:20:1) and immediately froze the samples on dry ice. PIP<sub>3</sub> levels  
595 were quantified by mass spectrometry as previously described<sup>52</sup>.

596

#### 597 Western blot

598 Purified T and B cells were isolated from murine spleens and stimulated as described above  
599 (PIP<sub>3</sub> measurement). For performing western blots the stimulation period was 5 min.  
600 Isolated T cells were stimulated with anti -CD3 1µg/ml and anti -CD28 (2 µg/ml) with or  
601 without 10 Nm nemoralisb; or B cells with anti- IgM 4µg/ml (AffinPure F(ab')<sub>2</sub> Fragment goat  
602 anti-mouse IgM from Jackson ImmunosResearch labs).

603 Stimulated T and B cells were lysed with ice-cold lysis buffer (50mM HEPES, 150mM NaCl, 10mM  
604 NaF, 10mM Indoacetamide, 1% IGEPAL and proteinase inhibitors (Complete Ultra tablets, Roche)) for  
605 15-20 min. Lysates were centrifuged at 15,000g for 10 min at 4 °C and supernatants were  
606 mixed with NuPage LDS sample buffer (life technologies). Samples were heated at 70°C and  
607 resolved on 4-12% NuPage bis-tris gel (Invitrogen), transferred to PVDF membranes and  
608 probed with the following antibodies: pAKT (T308, Cell Signaling, 1 in 1000 dilution); total  
609 AKT1 (2H10, Cell signaling, 1 in 2000 dilution); p110δ (Sc7176, Santa Cruz Biotechnology, 1  
610 in 200 dilution); pS6 (S235/236, Cell Signaling, 1 in 500 dilution); pFoxo1/3a (T24/T32, Cell  
611 Signaling, 1 in 1000 dilution); pErk (p44/42, Cell Signaling, 1 in 200 dilution); βActin  
612 (Sc47778, Santa Cruz Biotechnology, 1 in 2000 dilution).

#### 613 Statistics

614 Data analysis was performed in Graphpad Prism. Where two groups were compared we  
615 used student's t-test with Welch's correction. Where three or more groups were compared

616 we used 1-way ANOVA with Tukey's multiple comparisons test. Survival data was analyzed  
617 using the Gehan-Breslow-Wilcoxon test. Statistical significance is indicated by asterisk as  
618 follows:  $p > 0.05$  \*;  $p \leq 0.05$  \*\*;  $p \leq 0.01$  \*\*\*;  $p \leq 0.001$  \*\*\*\*

## 619 Ethics

620 Animal experiments were performed according to the Animals (Scientific Procedures) Act  
621 1986, licence PPL 70/7661.  
622 Informed consent was obtained from patients and healthy controls. This study conformed to  
623 the Declaration of Helsinki and according local ethical review document 12/WA/0148.

## 624 Acknowledgements

625 We thank Rahul Roychoudhuri, Bart Vanhaesebroeck and Martin Turner for their invaluable  
626 advice on the draft manuscript. We also thank Hicham Bouabe and Jürgen Heesemann (LMU  
627 Munich) for providing the  $110^{TIB}$  mice and for advice. We thank Ramkumar Venigalla for  
628 advice on B cell phenotyping and Alice Denton for advice on the detection of tissue resident  
629 cells in the lung. Rainer Döffinger provided advice on the use of Luminex for the  
630 quantification of antibodies against pneumococcal serotypes; Keith Burling helped quantify  
631 mouse serum immunoglobulins. We gratefully acknowledge the support from the Babraham  
632 Institute Biological Services Unit, Biological Chemistry, Mass Spectroscopy and Flow  
633 Cytometry Facilities. Funding for the project was from the Medical Research Council  
634 MR/M012328/2 (AS, AMC, SN, KO), Wellcome Trust 103413/Z/13/Z and 206618/Z/17/Z  
635 (AC), 095691/Z/11/Z (KO), 095198/Z/10/Z (SN) Biotechnology and Biological Sciences  
636 Research Council BBS/E/B/000 -C0407, -C0409, -C0427 and -C0428 (KO). EBH is currently  
637 employed by Cambridge University Hospitals NHS Foundation Trust but is seconded to  
638 spend 50% of his time on GSK clinical trial research. He receives no other benefits or  
639 compensation from GSK. EBH was funded by the Wellcome Trust Translational Medicine and  
640 Therapeutics (TMAT) PhD program. SN is also supported by the National Institute for Health  
641 Research (NIHR) Cambridge Biomedical Research Centre. MRC is supported by the National  
642 Institute of Health Research (NIHR) Cambridge Biomedical Research Centre and the NIHR  
643 Blood and Transplant Research Unit and by a Medical Research Council New Investigator  
644 Research Grant (MR/N024907/1) and an Arthritis Research UK Cure Challenge Research  
645 Grant (21777). SS, GB, EBH, JNH and EMH are employed by GSK.

646 **Table 1: Antibodies**

647

| <b>anti-mouse</b>  | <b>Clone</b> | <b>Supplier</b>               |
|--------------------|--------------|-------------------------------|
| CCR2               | 475301       | R&D Systems                   |
| CD11b              | M1/70        | Biolegend                     |
| CD11c              | N418         | Biolegend                     |
| CD138              | 281-2        | Biolegend                     |
| CD19               | ID3          | BD Biosciences                |
| CD1d               | K253         | Biolegend                     |
| CD21               | 7E9          | Biolegend                     |
| CD23               | B3B4         | Biolegend                     |
| CD25               | PC61         | Biolegend                     |
| CD28               | 37.51        | Biolegend                     |
| CD3                | 2C11         | Biolegend                     |
| CD4                | GK1.5        | Biolegend                     |
| CD43               | S7           | BD Biosciences                |
| CD44               | IM7          | Biolegend                     |
| CD45               | 30-F11       | Biolegend                     |
| CD45R(B220)        | RA3-6B2      | BD Biosciences                |
| CD5                | 53-7-3       | eBioscience<br>(ThermoFisher) |
| CD62L              | MEL-14       | Biolegend                     |
| CD8a               | 53-6.7       | Biolegend                     |
| FoxP3              | FJK-16s      | eBioscience<br>(ThermoFisher) |
| IgD                | 11-26c.2a    | Biolegend                     |
| IgM                | II/41        | eBioscience<br>(ThermoFisher) |
| IL-7R              | A7R34        | Biolegend                     |
| KLRG1              | 2F1          | Biolegend                     |
| Ly6C               | HK1.4        | Biolegend                     |
| Ly6G               | 1A8          | Biolegend                     |
| Ly6G/Ly6C(Gr1)     | RB6-8C5      | Biolegend                     |
| NK1.1              | PK136        | Biolegend                     |
| Siglec-F           | E50-2440     | BD Biosciences                |
| TCR $\beta$        | H57-597      | Biolegend                     |
| $\gamma\delta$ TCR | UC7-13D5     | Biolegend                     |
|                    |              |                               |
| <b>anti-human</b>  | <b>Clone</b> | <b>Supplier</b>               |
| CD19               | SJ25C1       | BD Biosciences                |
| CD24               | ML5          | BD Biosciences                |
| CD38               | HIT2         | BD Biosciences                |
| IL-10              | JES3-9D7     | Miltenyi Biotec               |

648



## 649 References

- 650 1. WHO 2005 <http://www.who.int/biologicals/areas/vaccines/pneumo/en/>.
- 651 2. Drijkoningen, J.J. & Rohde, G.G. Pneumococcal infection in adults: burden of disease.  
652 *Clin Microbiol Infect* **20 Suppl 5**, 45-51 (2014).
- 653 3. Levine, O.S. *et al.* Pneumococcal vaccination in developing countries. *Lancet* **367**,  
654 1880-1882 (2006).
- 655 4. O'Brien, K.L. *et al.* Burden of disease caused by *Streptococcus pneumoniae* in  
656 children younger than 5 years: global estimates. *Lancet* **374**, 893-902 (2009).
- 657 5. Wilson, R. *et al.* Naturally Acquired Human Immunity to *Pneumococcus* Is Dependent  
658 on Antibody to Protein Antigens. *PLoS pathogens* **13**, e1006137 (2017).
- 659 6. Bruton, O.C. Agammaglobulinemia. *Pediatrics* **9**, 722-728 (1952).
- 660 7. Tsukada, S. *et al.* Deficient expression of a B cell cytoplasmic tyrosine kinase in  
661 human X-linked agammaglobulinemia. *Cell* **72**, 279-290 (1993).
- 662 8. Vetrie, D. *et al.* The gene involved in X-linked agammaglobulinaemia is a member of  
663 the src family of protein-tyrosine kinases. *Nature* **361**, 226-233 (1993).
- 664 9. Jou, S.T. *et al.* Identification of variations in the human phosphoinositide 3-kinase  
665 p110delta gene in children with primary B-cell immunodeficiency of unknown  
666 aetiology. *International journal of immunogenetics* **33**, 361-369 (2006).
- 667 10. Angulo, I. *et al.* Phosphoinositide 3-kinase delta gene mutation predisposes to  
668 respiratory infection and airway damage. *Science* **342**, 866-871 (2013).
- 669 11. Lucas, C.L. *et al.* Dominant-activating germline mutations in the gene encoding the  
670 PI(3)K catalytic subunit p110delta result in T cell senescence and human  
671 immunodeficiency. *Nat Immunol* **15**, 88-97 (2014).
- 672 12. Lucas, C.L., Chandra, A., Nejentsev, S., Condliffe, A.M. & Okkenhaug, K. PI3Kdelta and  
673 primary immunodeficiencies. *Nat Rev Immunol* **16**, 702-714 (2016).
- 674 13. Okkenhaug, K. Signaling by the phosphoinositide 3-kinase family in immune cells.  
675 *Annu Rev Immunol* **31**, 675-704 (2013).
- 676 14. Coulter, T.I. *et al.* Clinical spectrum and features of activated phosphoinositide 3-  
677 kinase delta syndrome: A large patient cohort study. *J Allergy Clin Immunol* **139**, 597-  
678 606 e594 (2017).
- 679 15. Condliffe, A. & Chandra, A. Respiratory Manifestations of the Activated  
680 Phosphoinositide 3-kinase Delta Syndrome *Frontiers in immunology* **In press** (2018).
- 681 16. Stark, A.K., Sriskantharajah, S., Hessel, E.M. & Okkenhaug, K. PI3K inhibitors in  
682 inflammation, autoimmunity and cancer. *Curr Opin Pharmacol* **23**, 82-91 (2015).
- 683 17. Cahn, A. *et al.* Safety, pharmacokinetics and dose-response characteristics of  
684 GSK2269557, an inhaled PI3Kdelta inhibitor under development for the treatment of  
685 COPD. *Pulm Pharmacol Ther* **46**, 69-77 (2017).
- 686 18. Down, K. *et al.* Optimization of Novel Indazoles as Highly Potent and Selective  
687 Inhibitors of Phosphoinositide 3-Kinase delta for the Treatment of Respiratory  
688 Disease. *J Med Chem* **58**, 7381-7399 (2015).
- 689 19. Okkenhaug, K. *et al.* Impaired B and T cell antigen receptor signaling in p110delta PI  
690 3-kinase mutant mice. *Science* **297**, 1031-1034 (2002).
- 691 20. Briles, D.E. *et al.* Antiphosphocholine antibodies found in normal mouse serum are  
692 protective against intravenous infection with type 3 streptococcus pneumoniae. *J*  
693 *Exp Med* **153**, 694-705 (1981).

- 694 21. Mi, Q.S. *et al.* Highly reduced protection against *Streptococcus pneumoniae* after  
695 deletion of a single heavy chain gene in mouse. *Proc Natl Acad Sci U S A* **97**, 6031-  
696 6036 (2000).
- 697 22. Durand, C.A. *et al.* Phosphoinositide 3-kinase p110 delta regulates natural antibody  
698 production, marginal zone and B-1 B cell function, and autoantibody responses. *J*  
699 *Immunol* **183**, 5673-5684 (2009).
- 700 23. Rolf, J. *et al.* Phosphoinositide 3-kinase activity in T cells regulates the magnitude of  
701 the germinal center reaction. *J Immunol* **185**, 4042-4052 (2010).
- 702 24. Clayton, E. *et al.* A crucial role for the p110delta subunit of phosphatidylinositol 3-  
703 kinase in B cell development and activation. *J Exp Med* **196**, 753-763 (2002).
- 704 25. Shapiro, E.D. *et al.* The protective efficacy of polyvalent pneumococcal  
705 polysaccharide vaccine. *N Engl J Med* **325**, 1453-1460 (1991).
- 706 26. Kitamura, D., Roes, J., Kuhn, R. & Rajewsky, K. A B cell-deficient mouse by targeted  
707 disruption of the membrane exon of the immunoglobulin mu chain gene. *Nature*  
708 **350**, 423-426 (1991).
- 709 27. van der Sluijs, K.F. *et al.* IL-10 is an important mediator of the enhanced susceptibility  
710 to pneumococcal pneumonia after influenza infection. *J Immunol* **172**, 7603-7609  
711 (2004).
- 712 28. Barthelemy, A. *et al.* Influenza A virus-induced release of interleukin-10 inhibits the  
713 anti-microbial activities of invariant natural killer T cells during invasive  
714 pneumococcal superinfection. *Mucosal Immunol* **10**, 460-469 (2017).
- 715 29. Bouabe, H., Liu, Y., Moser, M., Bosl, M.R. & Heesemann, J. Novel highly sensitive IL-  
716 10-beta-lactamase reporter mouse reveals cells of the innate immune system as a  
717 substantial source of IL-10 in vivo. *J Immunol* **187**, 3165-3176 (2011).
- 718 30. Tedder, T.F. B10 cells: a functionally defined regulatory B cell subset. *J Immunol* **194**,  
719 1395-1401 (2015).
- 720 31. Hardy, R.R. & Hayakawa, K. B cell development pathways. *Annu Rev Immunol* **19**,  
721 595-621 (2001).
- 722 32. Vlkova, M. *et al.* Regulatory B cells in CVID patients fail to suppress multifunctional  
723 IFN-gamma+ TNF-alpha+ CD4+ T cells differentiation. *Clin Immunol* **160**, 292-300  
724 (2015).
- 725 33. Mauri, C. & Menon, M. Human regulatory B cells in health and disease: therapeutic  
726 potential. *J Clin Invest* **127**, 772-779 (2017).
- 727 34. Smith, N.M. *et al.* Regionally compartmentalized resident memory T cells mediate  
728 naturally acquired protection against pneumococcal pneumonia. *Mucosal Immunol*  
729 **11**, 220-235 (2018).
- 730 35. Penalzoza, H.F. *et al.* Interleukin-10 plays a key role in the modulation of neutrophils  
731 recruitment and lung inflammation during infection by *Streptococcus pneumoniae*.  
732 *Immunology* **146**, 100-112 (2015).
- 733 36. Shen, P. & Fillatreau, S. Antibody-independent functions of B cells: a focus on  
734 cytokines. *Nat Rev Immunol* **15**, 441-451 (2015).
- 735 37. Esplin, B.L., Welner, R.S., Zhang, Q., Borghesi, L.A. & Kincade, P.W. A differentiation  
736 pathway for B1 cells in adult bone marrow. *Proc Natl Acad Sci U S A* **106**, 5773-5778  
737 (2009).
- 738 38. Matsushita, T. *et al.* A novel splenic B1 regulatory cell subset suppresses allergic  
739 disease through phosphatidylinositol 3-kinase-Akt pathway activation. *J Allergy Clin*  
740 *Immunol* **138**, 1170-1182 e1179 (2016).

- 741 39. Browning, M.J., Chandra, A., Carbonaro, V., Okkenhaug, K. & Barwell, J. Cowden's  
742 syndrome with immunodeficiency. *J Med Genet* **52**, 856-859 (2015).
- 743 40. Tsujita, Y. *et al.* Phosphatase and tensin homolog (PTEN) mutation can cause  
744 activated phosphatidylinositol 3-kinase delta syndrome-like immunodeficiency. *J*  
745 *Allergy Clin Immunol* **138**, 1672-1680 e1610 (2016).
- 746 41. To, Y. *et al.* Targeting phosphoinositide-3-kinase-delta with theophylline reverses  
747 corticosteroid insensitivity in chronic obstructive pulmonary disease. *Am J Respir Crit*  
748 *Care Med* **182**, 897-904 (2010).
- 749 42. Rao, V.K. *et al.* Effective "activated PI3Kdelta syndrome"-targeted therapy with the  
750 PI3Kdelta inhibitor leniolisib. *Blood* **130**, 2307-2316 (2017).
- 751 43. Coutre, S.E. *et al.* Management of adverse events associated with idelalisib  
752 treatment: expert panel opinion. *Leuk Lymphoma* **0**, 1-8 (2015).
- 753 44. Lee, P.P. *et al.* A critical role for Dnmt1 and DNA methylation in T cell development,  
754 function, and survival. *Immunity* **15**, 763-774 (2001).
- 755 45. Hobeika, E. *et al.* Testing gene function early in the B cell lineage in mb1-cre mice.  
756 *Proc Natl Acad Sci U S A* **103**, 13789-13794 (2006).
- 757 46. Clausen, B.E., Burkhardt, C., Reith, W., Renkawitz, R. & Forster, I. Conditional gene  
758 targeting in macrophages and granulocytes using LysMcre mice. *Transgenic Res* **8**,  
759 265-277 (1999).
- 760 47. Irizarry, R.A. *et al.* Exploration, normalization, and summaries of high density  
761 oligonucleotide array probe level data. *Biostatistics* **4**, 249-264 (2003).
- 762 48. Gentleman, R.C. *et al.* Bioconductor: open software development for computational  
763 biology and bioinformatics. *Genome Biol* **5**, R80 (2004).
- 764 49. Gautier, L., Cope, L., Bolstad, B.M. & Irizarry, R.A. affy--analysis of Affymetrix  
765 GeneChip data at the probe level. *Bioinformatics* **20**, 307-315 (2004).
- 766 50. Benjamini, Y. & Hochberg, Y. Controlling the False Discovery Rate: A Practical and  
767 Powerful Approach to Multiple Testing. *Journal of the Royal Statistical Society. Series*  
768 *B (Methodological)* **57**, 289-300 (1995).
- 769 51. Willcocks, L.C. *et al.* The effect of sirolimus therapy on vaccine responses in  
770 transplant recipients. *Am J Transplant* **7**, 2006-2011 (2007).
- 771 52. Clark, J. *et al.* Quantification of PtdInsP3 molecular species in cells and tissues by  
772 mass spectrometry. *Nature methods* **8**, 267-272 (2011).
- 773  
774

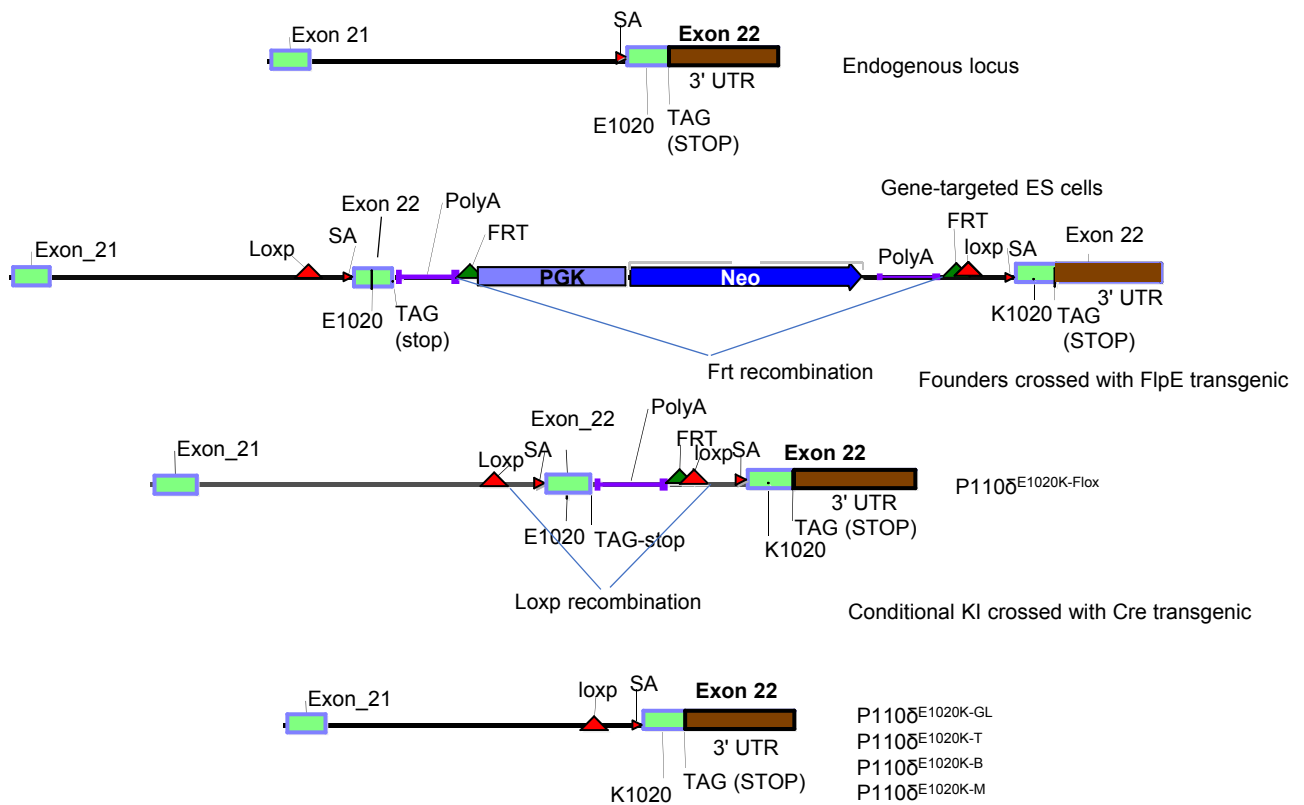

### Supplementary Figure 1: Gene targeting strategy for generating conditional $p110\delta^{E1020K}$ mice

The  $p110\delta^{E1020K}$  mice were generated by OzGene using homologous recombination in ES cells. A duplicate sequence corresponding to the last coding exon in *Pik3cd* was flanked by loxP sites and inserted 3' to the original sequence. The original sequence encoding E1020 was mutated to K1020. Upon Cre-mediated recombination, the wild-type sequence is replaced by the mutant E1020K sequence. In this study, we used *Tnfrsf4<sup>cre</sup>* to delete in the germline, *Cd4<sup>cre</sup>* to delete in T cells, *Mb1<sup>cre</sup>* to delete in B cells and *Lyz2<sup>cre</sup>* to delete in myeloid cells.

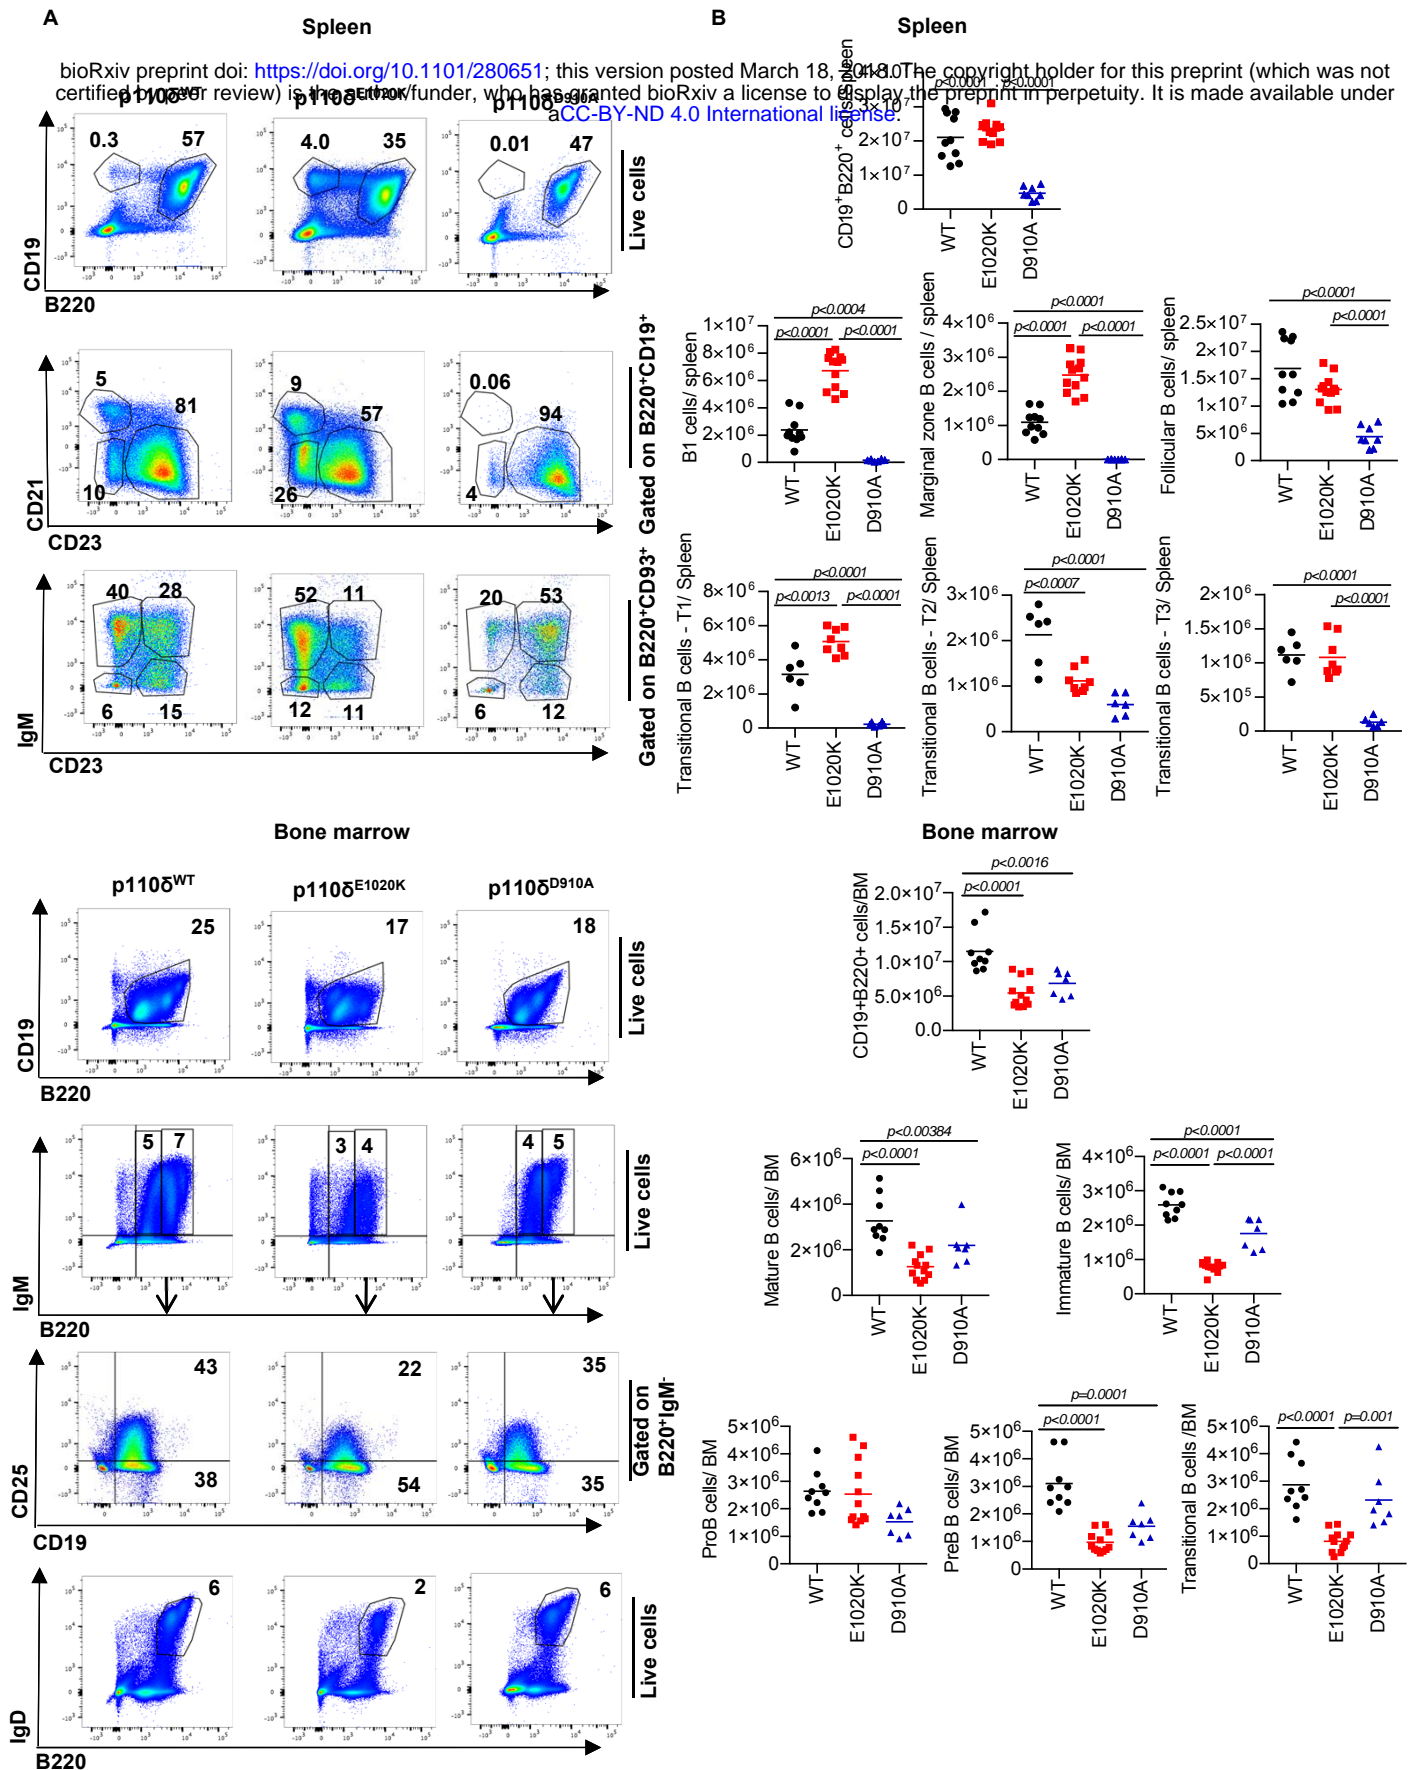

**Supplementary figure 2: Phenotype of B cells in p110<sup>δ</sup><sup>E1020K-GL</sup> mice.**

**A:** B cell subsets in the spleen and bone marrow from wild-type, p110<sup>δ</sup><sup>E1020K-GL</sup> and p110<sup>δ</sup><sup>D910A</sup> mice were analyzed by flow cytometry and representative pseudocolor plots with the mean cell proportion are shown. **B:** In the spleen, total CD19<sup>+</sup>B220<sup>+</sup> B cells were increased in p110<sup>δ</sup><sup>E1020K-GL</sup> mice, due to increased numbers of B1, marginal zone (MZ) and T1 transitional cells while follicular B cell numbers were normal. These populations were reduced in p110<sup>δ</sup><sup>D910A</sup> mice. Analysis of the bone marrow showed normal pro-B cell numbers in p110<sup>δ</sup><sup>E1020K-GL</sup> mice with a reduced number of pre-B cells, immature, transitional and mature B cells. Populations of cells are described as follows: Spleen B cells: Total B cells CD19<sup>+</sup>B220<sup>+</sup>, B1 cells CD19<sup>+</sup>B220<sup>+</sup>CD23<sup>+</sup>CD21<sup>-</sup>, Follicular B cells CD19<sup>+</sup>B220<sup>+</sup>CD23<sup>-</sup>CD21<sup>+</sup>, Marginal zone B cells CD19<sup>+</sup>B220<sup>+</sup>CD23<sup>-</sup>CD21<sup>+</sup>, Transitional T1 B cells B220<sup>+</sup>CD93<sup>+</sup>IgM<sup>-</sup>CD23<sup>-</sup>, Transitional T2 B cells B220<sup>+</sup>CD93<sup>+</sup>IgM<sup>+</sup>CD23<sup>+</sup>, Transitional T3 B cells B220<sup>+</sup>CD93<sup>+</sup>IgM<sup>-</sup>CD23<sup>-</sup>; Bone marrow B cells - Immature B cells CD19<sup>+</sup>B220<sup>0</sup>IgM<sup>+</sup>, Mature B cells CD19<sup>+</sup>B220<sup>hi</sup>IgM<sup>+</sup>, Pro-B cells B220<sup>+</sup>IgM<sup>-</sup>CD19<sup>+</sup>CD25<sup>+</sup>, Pre-B cells B220<sup>+</sup>IgM<sup>-</sup>CD19<sup>+</sup>CD25<sup>+</sup>, Transitional B cells B220<sup>+</sup>IgD<sup>+</sup>. (Combined data from 2 independent experiments, n=8-12).

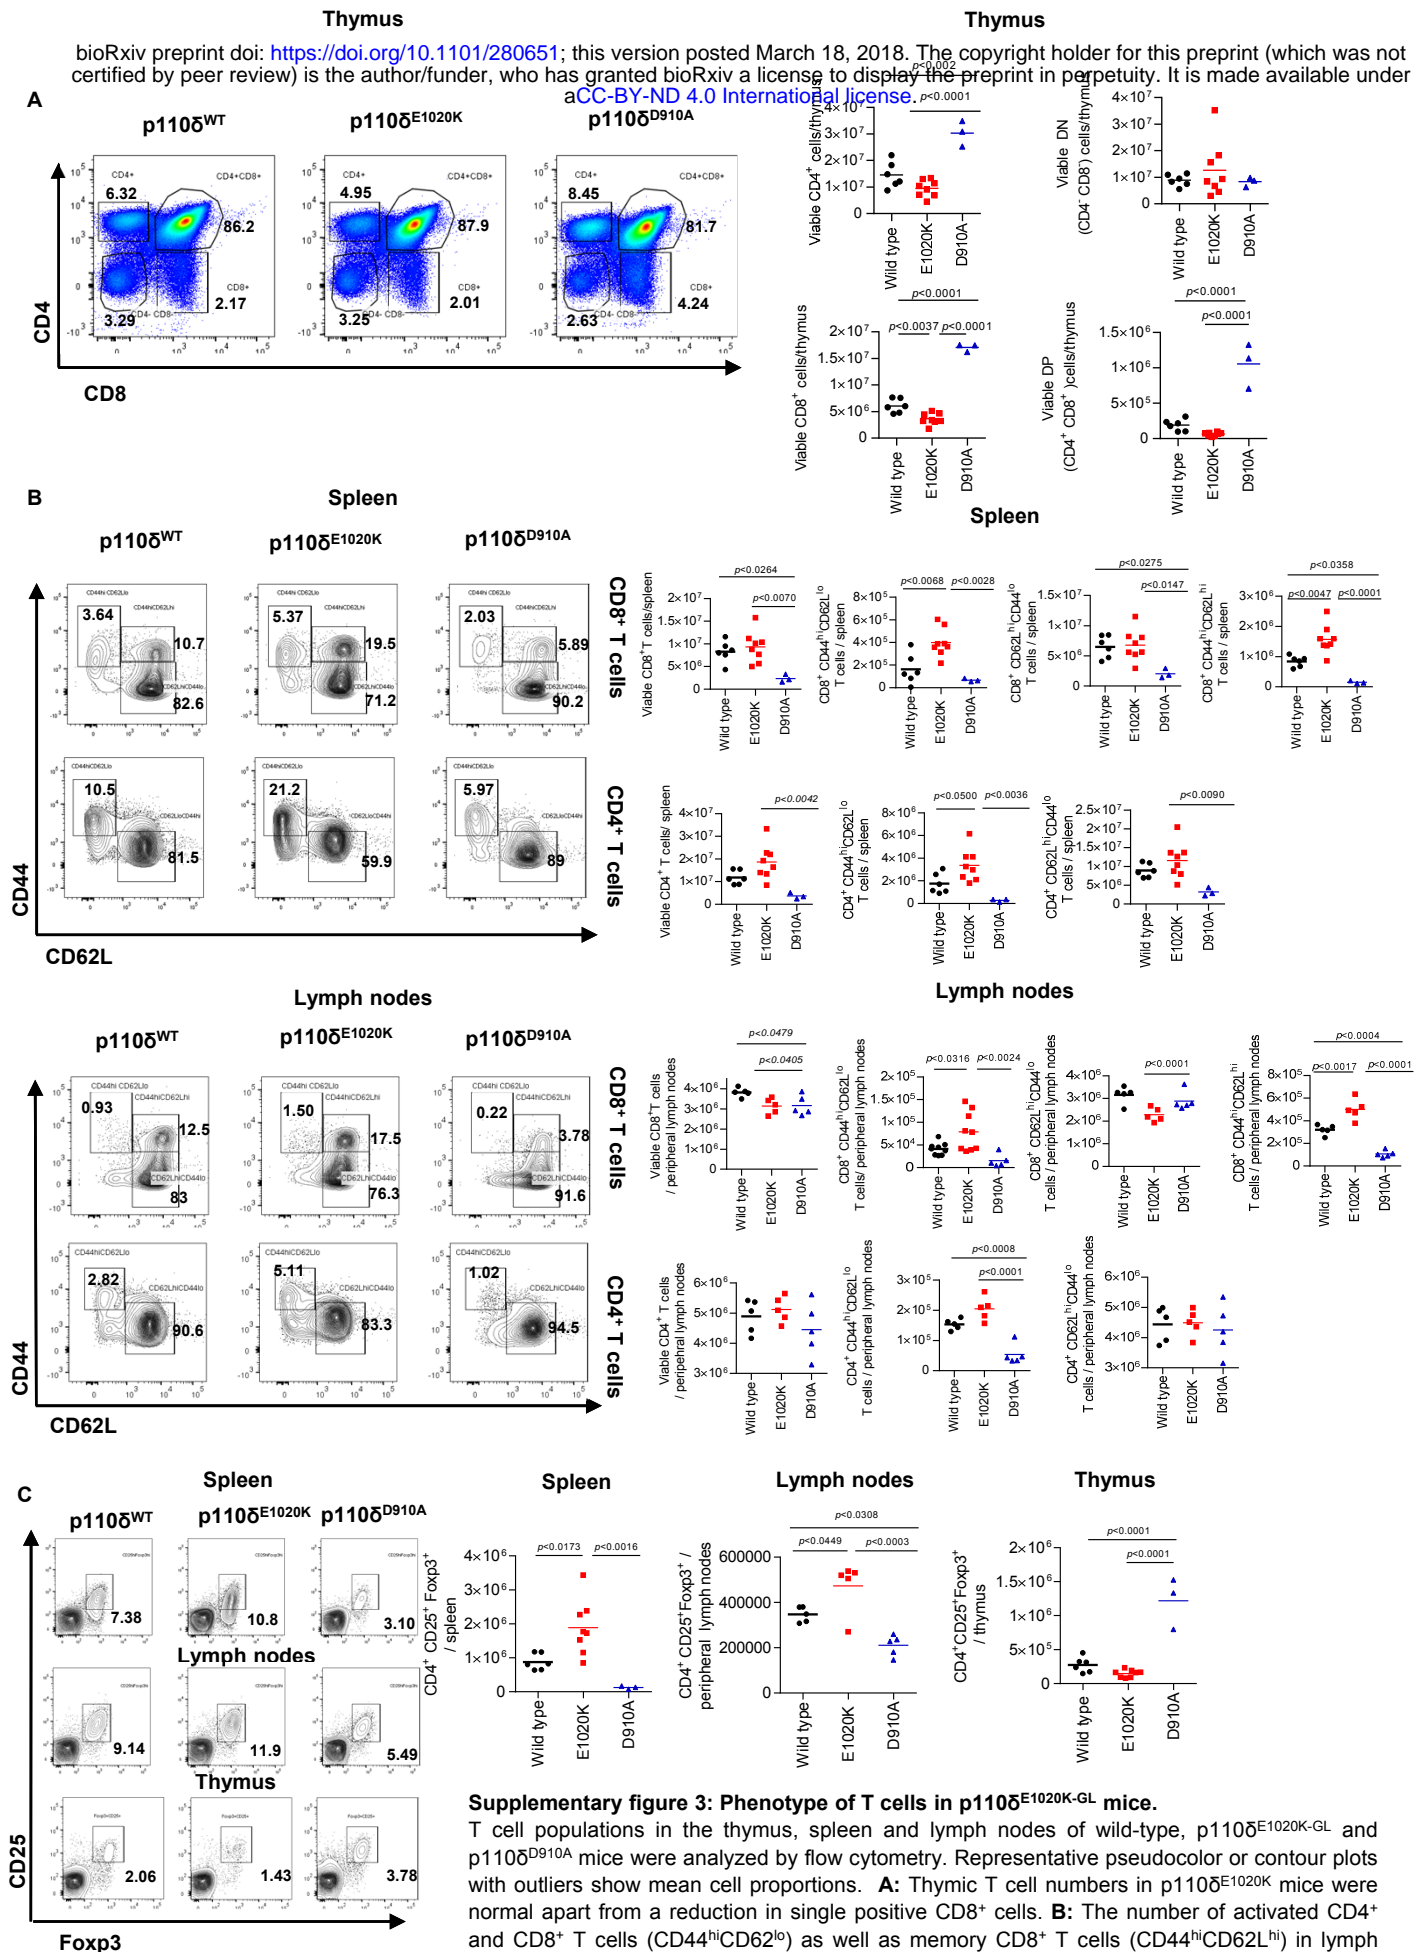

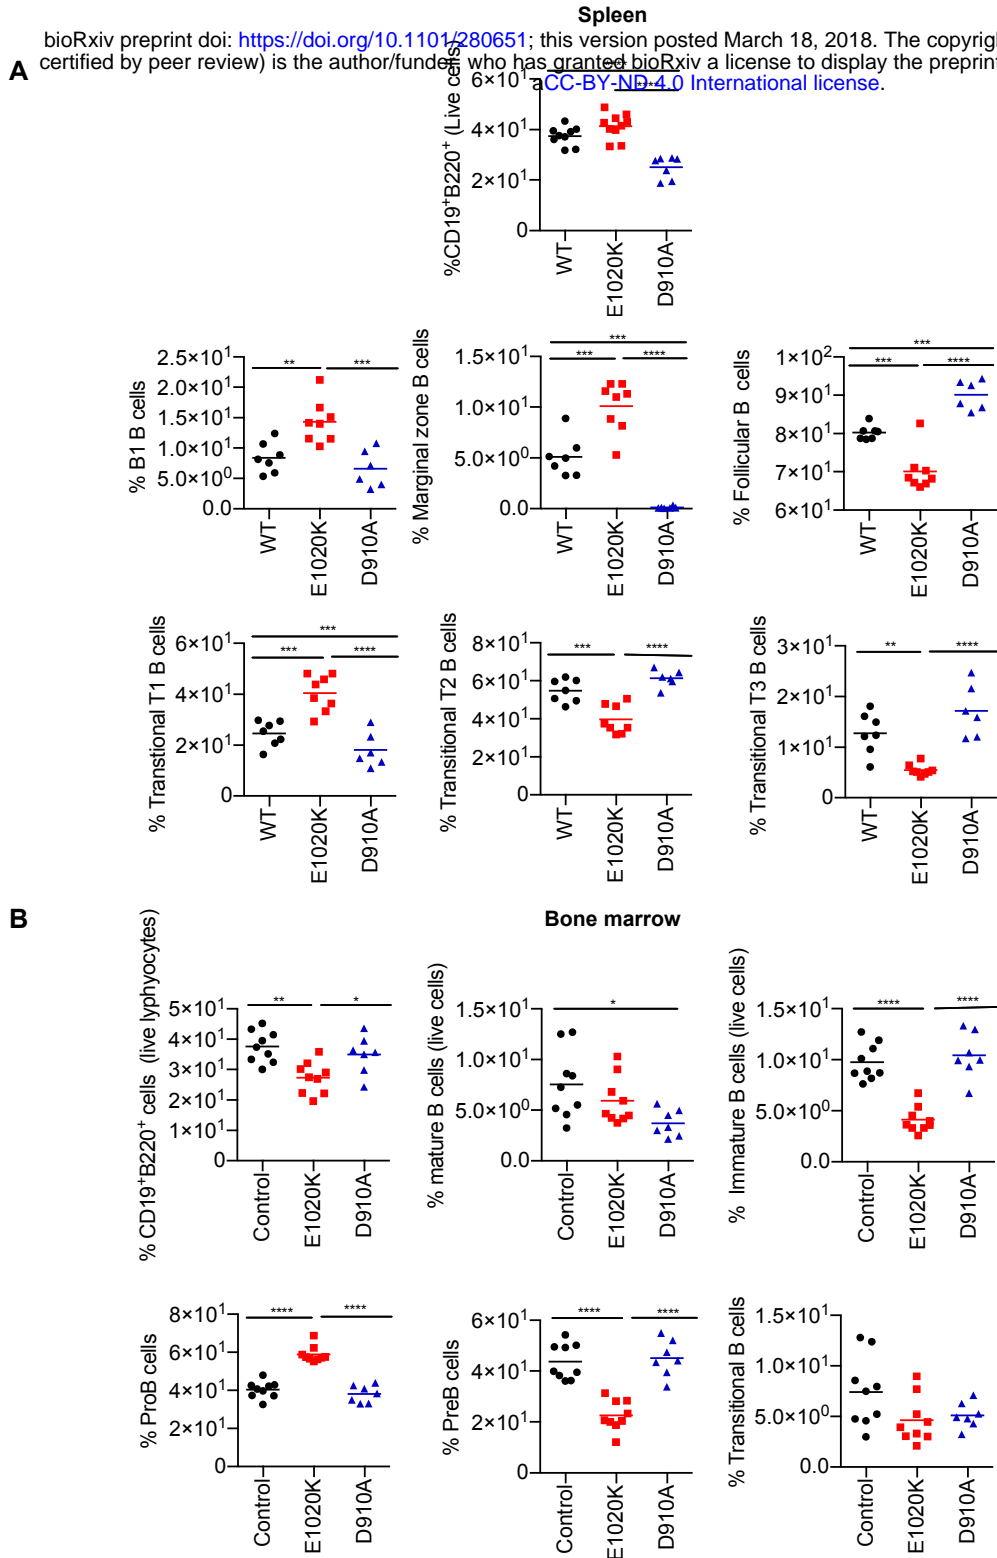

**Supplementary figure 4: Phenotype of B cells in p110δ<sup>E1020K-B</sup> mice.**

B cell subsets in the spleen and bone marrow from wild-type, p110δ<sup>E1020K-B</sup> and p110δ<sup>D910A</sup> mice were analyzed by flow cytometry, and was shown to recapitulate the phenotype of p110δ<sup>E1020K-GL</sup> mice. **A**: In the spleen, the proportion of B1, marginal zone (MZ) and T1 transitional cells were increased, while the proportion of follicular B cells were reduced. **B**: Analysis of the bone marrow showed increased proportions of pro-B cells in p110δ<sup>E1020K-B</sup> mice with reduced proportions of pre-B cells and immature B cells, and a trend towards reduced proportions of transitional and mature B cells. Populations of cells are described as follows: Splenic B cells - Total B cells CD19<sup>+</sup>B220<sup>+</sup>, B1 cells CD19<sup>+</sup>B220<sup>+</sup>CD23<sup>-</sup>CD21<sup>-</sup>, Follicular B cells CD19<sup>+</sup>B220<sup>+</sup>CD23<sup>+</sup>CD21<sup>+</sup>, Marginal zone B cells CD19<sup>+</sup>B220<sup>+</sup>CD23<sup>-</sup>CD21<sup>+</sup>, Transitional T1 B cells B220<sup>+</sup>CD93<sup>+</sup>IgM<sup>+</sup>CD23<sup>-</sup>, Transitional T2 B cells B220<sup>+</sup>CD93<sup>+</sup>IgM<sup>+</sup>CD23<sup>+</sup>, Transitional T3 B cells B220<sup>+</sup>CD93<sup>+</sup>IgM<sup>-</sup>CD23<sup>-</sup>; Bone marrow B cells - Immature B cells CD19<sup>+</sup>B220<sup>lo</sup>IgM<sup>+</sup>, Mature B cells CD19<sup>+</sup>B220<sup>hi</sup>IgM<sup>+</sup>, Pro-B cells B220<sup>+</sup>IgM<sup>-</sup>CD19<sup>+</sup>CD25<sup>-</sup>, Pre-B cells B220<sup>+</sup>IgM<sup>+</sup>CD19<sup>+</sup>CD25<sup>+</sup>, Transitional B cells B220<sup>+</sup>IgD<sup>+</sup>. (Combined data from 2 independent experiments, n=6-10).

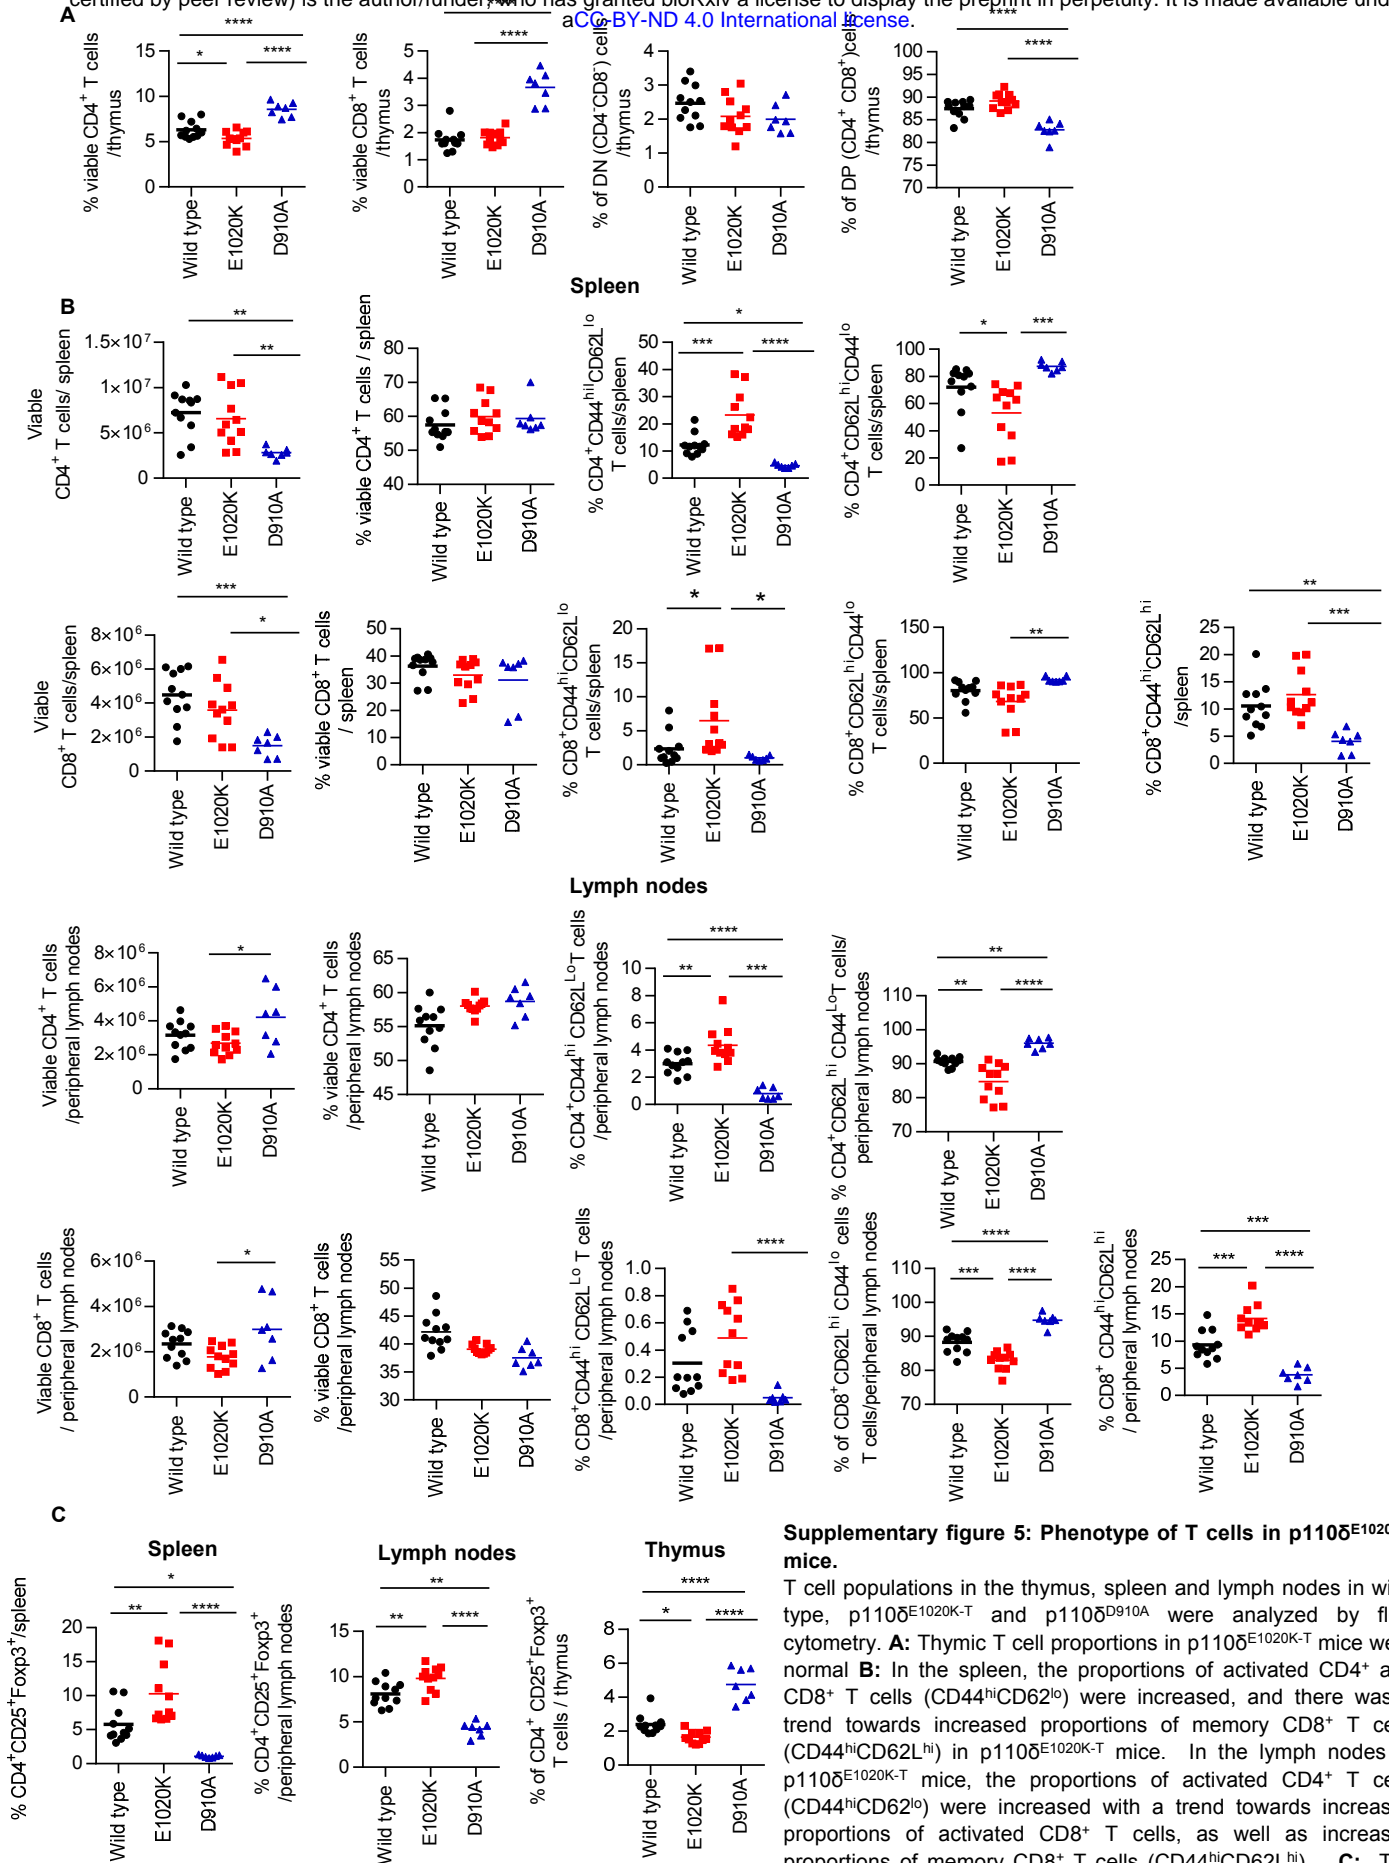



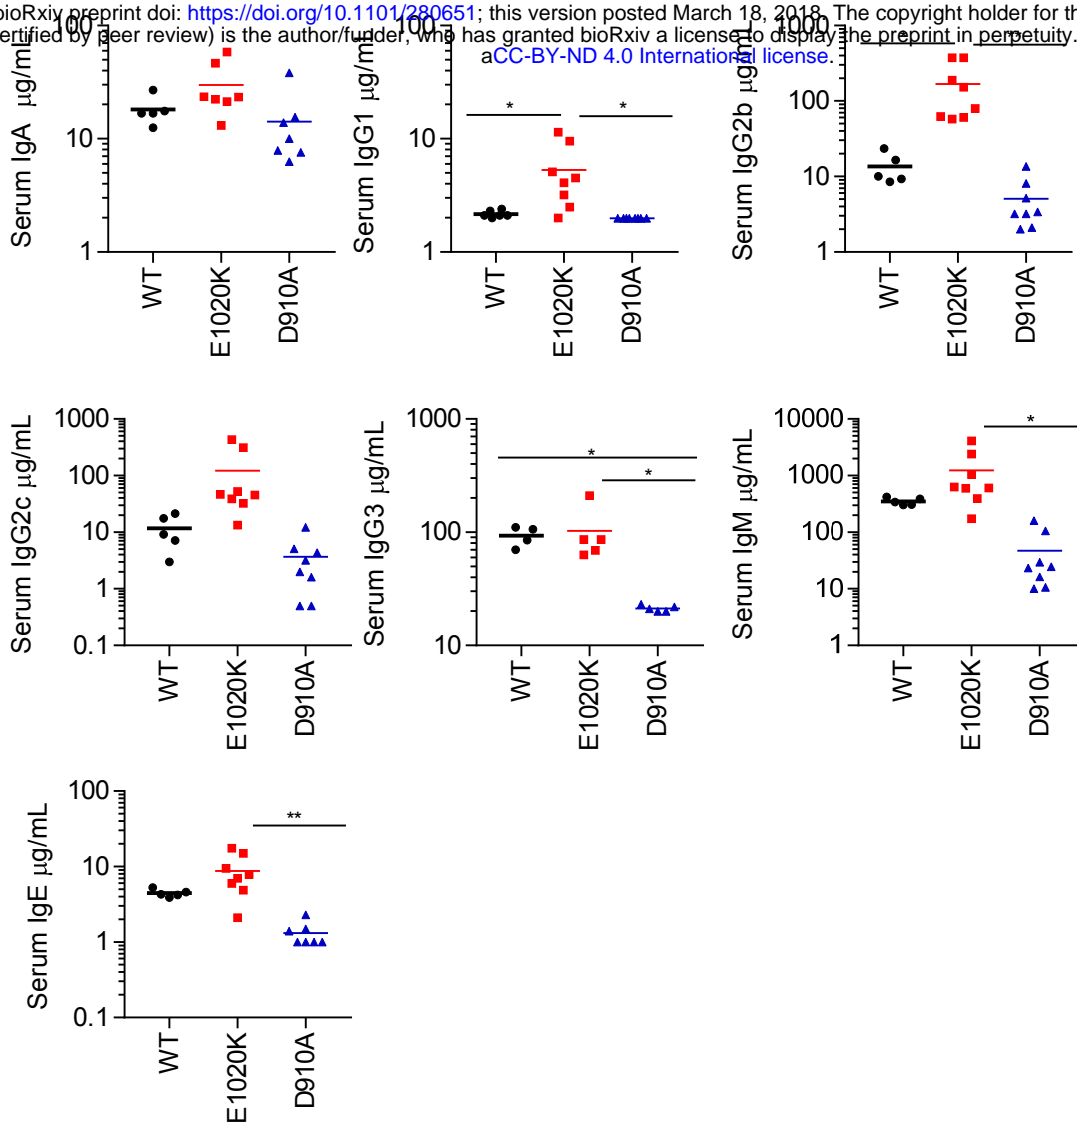

**Supplementary figure 6: Serum immunoglobulins in p1105<sup>E1020K-GL</sup> mice.**

Analysis of serum immunoglobulins from naïve mice (age 8-12 weeks) showed significantly increased levels of IgG1 and IgG2b, and a trend towards increased levels IgG2c, IgM, IgA, and IgE in p1105<sup>E1020K-GL</sup> mice, while IgG3 levels were similar compared to wild-type mice. p1105<sup>D910A</sup> mice were antibody deficient for all isotypes analyzed. (n= 6-7).

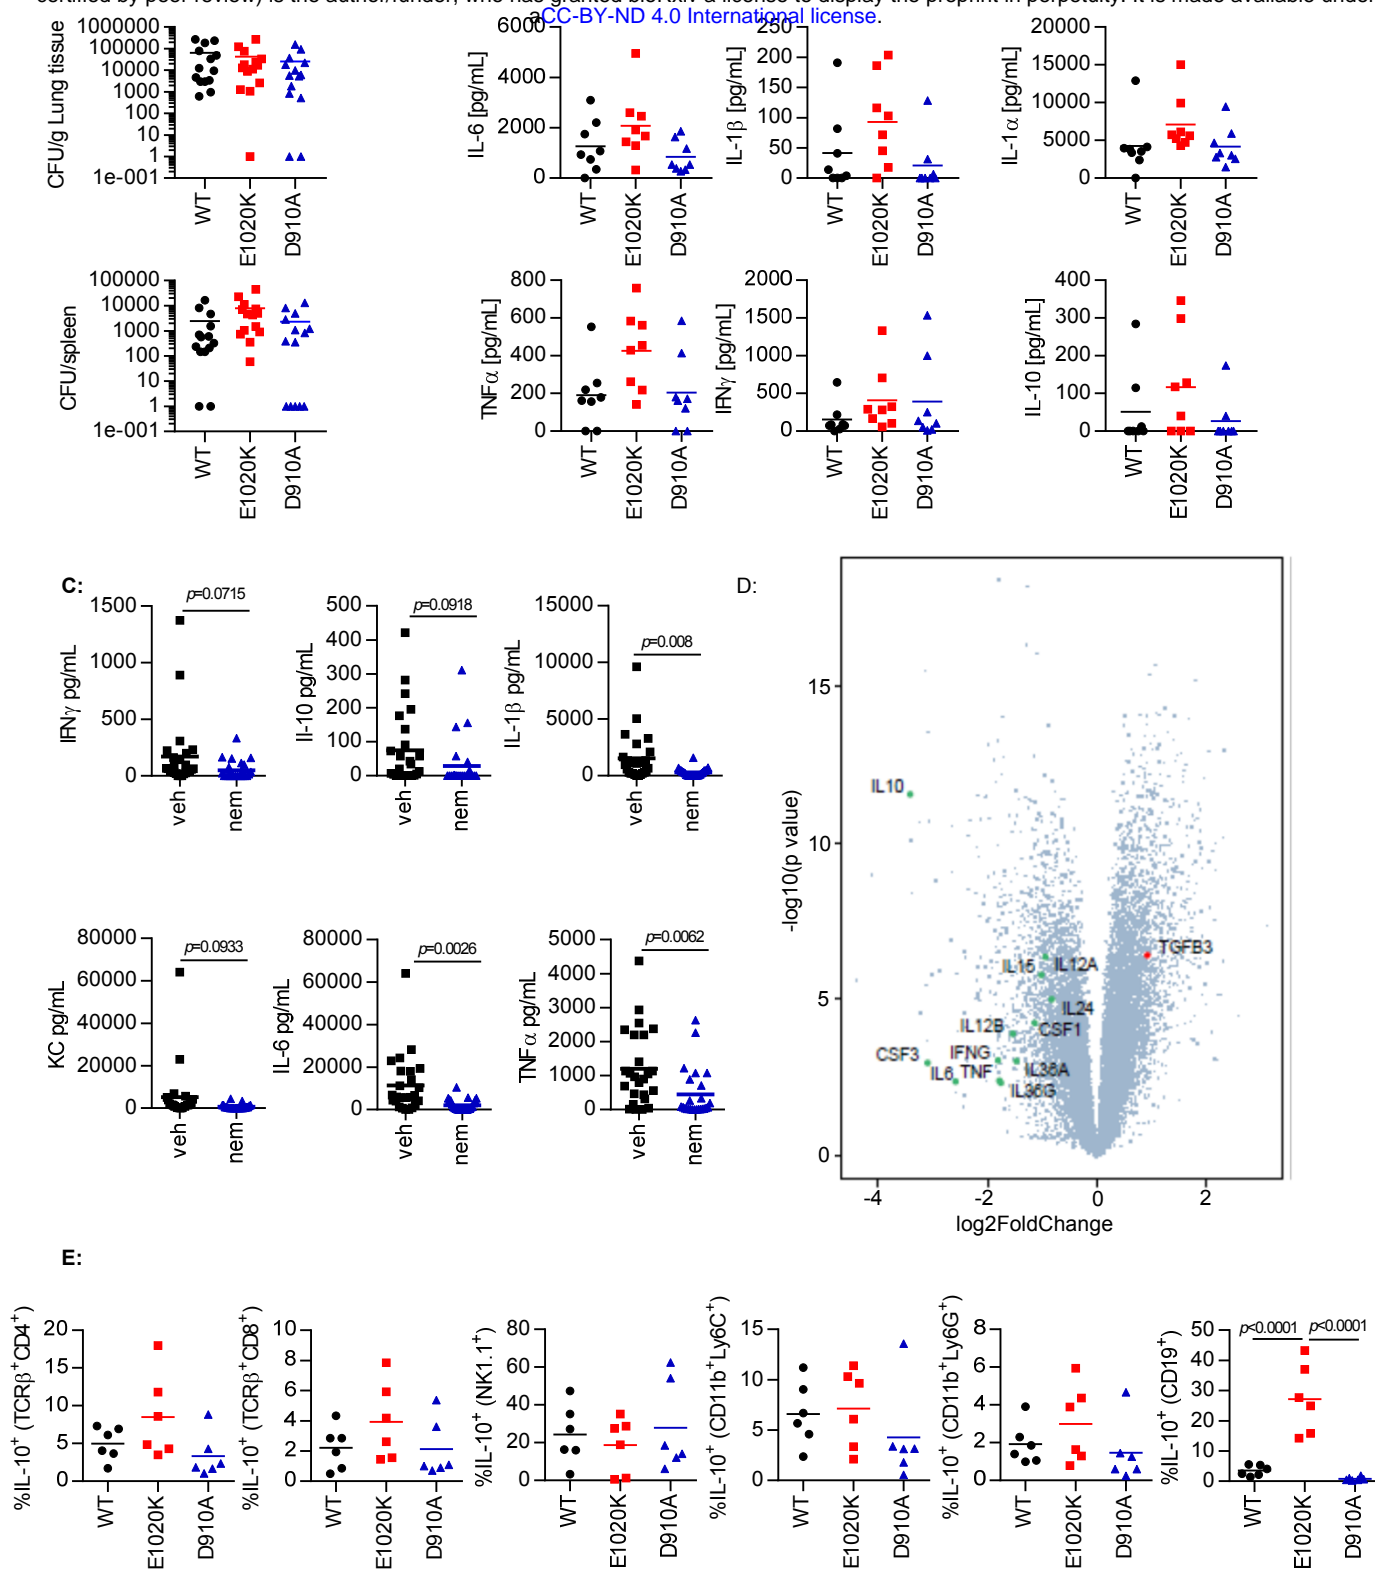

**Supplementary Figure 7: PI3K $\delta$  signaling regulates B cell specific IL-10 production in the lung following *S. pneumoniae* infection.**

**A:** 24h post *S. pneumoniae* infection, lung and spleen CFU counts were similar in wild-type, p110 $\delta$ <sup>E1020K-GL</sup> and p110 $\delta$ <sup>D910A</sup> mice. **B:** 24h post infection, cytokine levels in the lung homogenate showed a trend towards increased TNF $\alpha$ , IL-6 and IL-1 in p110 $\delta$ <sup>E1020K</sup> mice. **C:** 24h prophylactic treatment with nemoralisib (nem) led to a significant reduction in TNF $\alpha$ , IL-6 and IL-1 $\beta$ , and a trend towards reduced IFN $\gamma$  and IL-10, in the lungs of wild-type mice compared to vehicle control (veh) treated animals at 24h post infection. **D:** Volcano plot (statistical significance against fold change) of the gene expression changes in response to nemoralisib treatment showed reduced levels of pro-inflammatory cytokines as well as IL-10 at 24h post infection compared to vehicle control treatment. All genes analysed are shown (grey dots) with the cytokines of interest labelled and coloured; green for those with a negative fold change, red for positive fold change. **E:** Analysis of immune cell subsets in *Il10*<sup>TiB</sup> reporter mice at 24h post infection showed that the proportion of IL-10 producing B cells is significantly increased in p110 $\delta$ <sup>E1020K-GL</sup> mice and reduced in p110 $\delta$ <sup>D910A</sup> mice compared to wild-type mice, with similar trends in T cells and myeloid cells not reaching significance. (A: results from 2 independent studies combined, n=14; B: representative data from 3 independent studies n=8; C: Combined data from 4 independent experiments n=25; D: data from 1 study, n=6; E: representative data from 2 independent studies n=6).

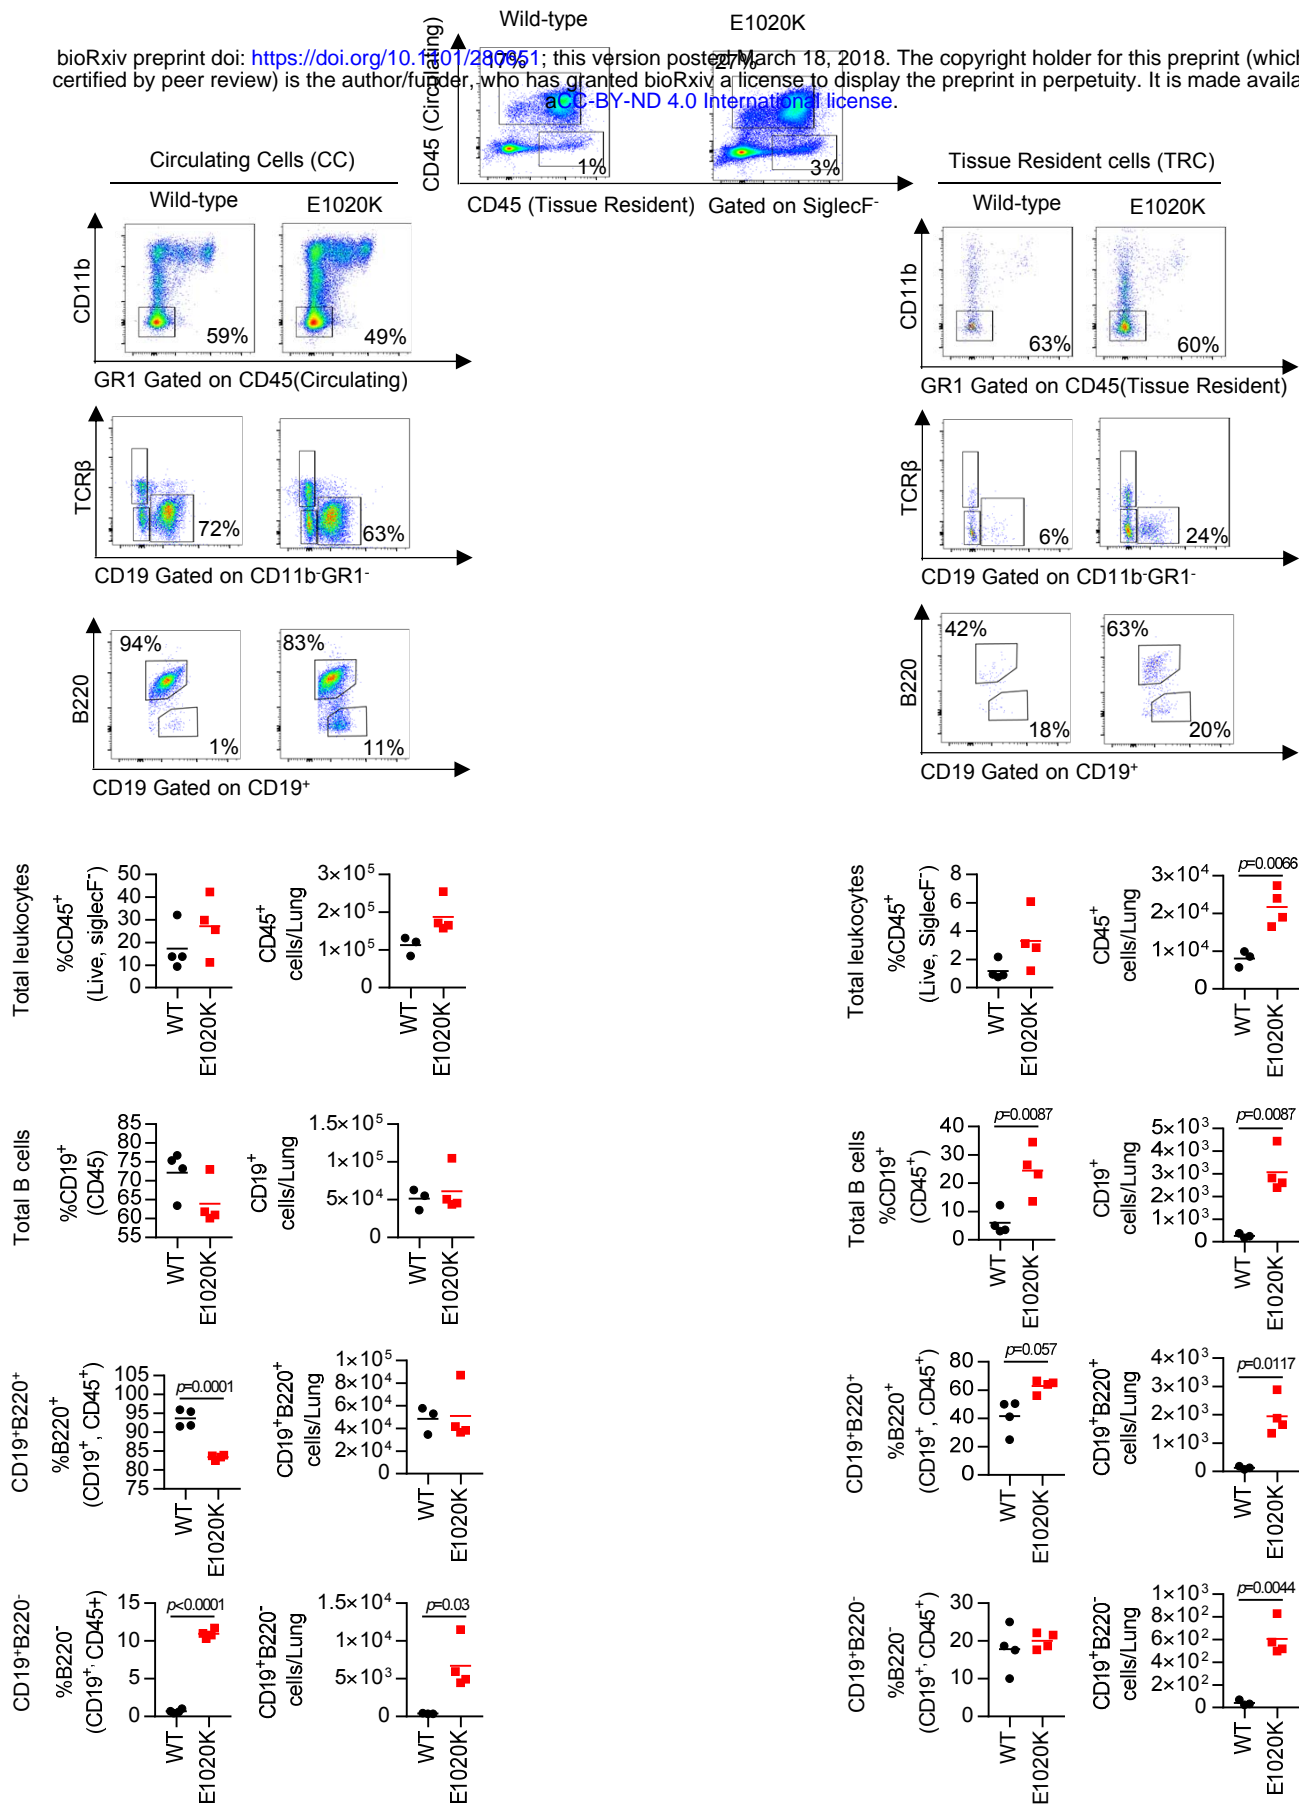

Source: https://www.biorxiv.org/content/10.1101/280651v1.full.pdf
